# Supplementary material for: A six-plex switchable DNA origami cipher disk for tandem-in-time cryptography
Source: Royal Society of Chemistry journal article supplement (doi:10.1039/d2cc01349e), 2022-01-01
Supplement: d2cc01349e1.pdf [file d2cc01349e1.pdf]

Supporting information

## **Six-plex switchable DNA origami cipher disk for tandem-in-time cryptography**

Yuxiang Dong<sup>a</sup>, Zehui Jin<sup>a</sup>, Xue Zhang<sup>a</sup>, Yuanyuan Tang<sup>ab</sup>, Ye Tian,<sup>\*ab</sup> Jun-Jie Zhu<sup>\*a</sup>  
and Qianhao Min<sup>\*a</sup>

<sup>a</sup>State Key Laboratory of Analytical Chemistry for Life Science, School of Chemistry  
and Chemical Engineering, College of Engineering and Applied Sciences, Nanjing  
University, Nanjing, 210023, China. E-mail: minqianhao@nju.edu.cn;  
jjzhu@nju.edu.cn; ytian@nju.edu.cn

<sup>b</sup>Shenzhen Research Institute of Nanjing University, Shenzhen, 518000, China

## **Table of Contents**

**Materials**

**Preparation of ssDNA modified AuNPs**

**Design, fabrication and purification of Eoct-DOFs**

**Assembly of Eoct-DOF dimer and the DOCD**

**Information encryption and decryption by the DOCD**

**Negative-stained TEM characterization**

**Fluorescence monitoring of the space shift of AuNPs in the Eoct-DOF dimer**

**Fig. S1-S46**

**Tables S1-S8**

**References**

## **Materials**

Single-stranded M13mp18 DNA genome was purchased from Bayou Biolabs, America. All short oligonucleotides were obtained from Sangon Biotech Co. Ltd. (Shanghai, China). AuNP with diameter ~10 nm was bought from Ted Pella, Inc. Tris-(2-carboxyethyl)phosphine (TCEP), magnesium acetate and tris-acetate-EDTA (TAE) buffer were acquired from Aladdin Bio-Chem Technology Co. Ltd. (Shanghai, China).

## **Preparation of ssDNA modified AuNPs**

The 3'-thiolated DNA strands (HS-DNA1 and HS-DNA2, see Table S3 for the detailed sequences of thiolated DNA) were mixed with tris-(2-carboxyethyl)phosphine (TCEP) in ice water for 1.5 h (the ratio of TCEP to DNA at 100:1), and were then purified by size exclusion columns (G-25, GE Healthcare). Subsequently, the thiolated ssDNA was mixed with AuNPs solution (the ratio of DNA to AuNPs at 150 (HS-DNA1):150 (HS-DNA2):1 (AuNPs)) and incubated for 1.5 h. After that, phosphate buffer (10 mM) was added in the solution to age for 1.5 h. In the subsequent salt-aging process, 2.0 M NaCl solution was gradually added to the mixture during six steps at intervals of 1 h until the final concentration of NaCl reached 0.3 M. After 16 h, the unmodified ssDNA were removed by centrifugation at 20000 rcf for 1 h and washed by 0.01 M PBS buffer (10 mM phosphate buffer containing 0.1 M NaCl) for 4 times.

## **Design, fabrication and purification of Eoct-DOFs**

Elongated octahedron DNA origami frame (Eoct-DOF) was designed by caDNAno software (<http://cadnano.org/>)<sup>1,2</sup>. The frame was fabricated by mixing 10 nM M13mp18 DNA genome, 100 nM staple strands (Table S8), 75 nM anchor strands (including Anchor strands 1, 2, 3 for fixing single AuNP in frame A and Anchor strands 4, 5, 6 in frame B, Table S4), 100 nM sticky end strands and closing end strands (Table S5) in 40 mM tris-acetate, 1.0 mM EDTA, and 12.5 mM magnesium acetate (pH = 8.3 at 23 °C) buffer solution (1 × TAE buffer solution containing 12.5 mM magnesium acetate). The prepared mixture was then processed by the following annealing procedures:

1. 90 °C: 25 sec
2. 90 °C --->85 °C: with rate -0.1 °C / 5 sec

3. 85 °C --->65 °C: with rate -0.1 °C / 30 sec
4. 65 °C --->40 °C: with rate -0.1 °C / 4 min
5. 40 °C --->32 °C: with rate -0.1 °C / 2 min
6. 32 °C --->20 °C: with rate -0.1 °C / 1 min
7. Hold at 20 °C

The prepared DNA origami frame was purified by PEG precipitation according to the literature<sup>3</sup>. Briefly, 20 g PEG lumps (Mw: 8000 g/mol or 10,000 g/mol) were dissolved in 100 mL 2 × TE solution containing 500 mM NaCl for preparation of PEG buffer. The prepared DNA origami sample was mixed with the same amount of PEG buffer and was then centrifuged at 14500 rpm for 3 h. After the supernatant was removed, the condensed DNA origami sediment attached at the bottom was mixed with desired buffer solution (1 × TAE, 12.5 mM magnesium acetate) and redispersed at a constant temperature overnight (1000 rpm, 12 h, 37.5 °C).

#### **Assembly of Eoct-DOF dimer and the DOCD**

The Eoct-DOF dimer was assembled by mixing equal volume (50 µL) of purified Eoct-DOF A (10 nM) and Eoct-DOF B (10 nM) (see Fig. S4 and Table S5 for the structure design and sequences) in a centrifuge tube, followed by cooling down from 50 °C to 20 °C at the gradient of -0.2 °C/h. The DNA origami cipher disk (DOCD) was obtained by arranging the AuNPs in the prescribed position of Eoct-DOF dimer. Typically, 20 nM closing strands 1-6 were respectively mixed with 5 nM Eoct-DOF dimer at 37 °C for 30 min. Afterwards, ssDNA modified AuNPs were added into the solution with the molar ratio of AuNPs to Eoct-DOF dimer around 2:1. The different spatial distributions of AuNPs in the Eoct-DOF dimer can be adjusted by adding different input strands (the molar ratio of input strands to Eoct-DOF dimer at 6:1) with incubation at 37 °C for 30 min.

#### **Information encryption and decryption by the DOCD**

In this work, our designed DNA origami structure can exhibit six distinguishable visible patterns in response to different input DNA strands. By utilizing these programmable DNA origami patterns that can randomly and reversibly switch between each other, we presented a secure cryptography strategy based on six-plex switchable DOCD. By

defining each pattern as one specific cipher symbol, we get characters of all capital letters and Arabic numerals with 36 transitions from one cipher symbol to another. In this way, we develop a secure and efficient encrypted communication scheme. The procedure of encrypted communication between the encoder and decoder included the following steps (Fig. S43): 1) The message was first converted into a string of DNA strands by referring to the code book and key book. 2) The obtained DNA strands (10 or 100  $\mu\text{M}$  information strands, see Table S8 for detailed sequences) were assigned to different tubes, marked in sequence and then confidentially sent to the decoder. 3) After the tubes containing information strands were received, these information strands were in order added into the DOCD solution (212.4  $\mu\text{L}$ ) containing Eoct-DOF dimer (200  $\mu\text{L}$  5 nM), closing strands 1-6 (0.4  $\mu\text{L}$  10  $\mu\text{M}$  for each strand), and ssDNA modified AuNPs (10  $\mu\text{L}$  200 nM). All the AuNPs were located outside the Eoct-DOF dimer. The first set of information strands (0.6  $\mu\text{L}$  10  $\mu\text{M}$  for each strand) was added into the DOCD solution with the ratio of information strands to Eoct-DOF dimer at 6:1, and the mixture was incubated at 37  $^{\circ}\text{C}$  for 30 min. 5  $\mu\text{L}$  of the mixture was then pipetted out for the preparation of TEM specimens, before the addition of the second set of information strands (0.9  $\mu\text{L}$  10  $\mu\text{M}$  for each strand) into the mixture with the molar ratio of information strands to Eoct-DOF dimer at 9:1. In order to ensure a reaction efficiency as high as possible in each step during the chain replacement reaction, the amount of information strands was increased to 1.5 times compared to those added in the previous step. The above processes were repeated until the last set of information strands was added. 4) Finally, a string of cipher symbols was organized in a tandem-in-time format by TEM characterization of the prepared specimens, and 5) converted to plaintext message according to the code book.

#### **Negative-stained TEM characterization**

5.0  $\mu\text{L}$  of sample solution was deposited onto a carbon-coated Cu grid (Shunson Electronic Technology Co., LTD (Shenzhen, China)) pretreated with glow discharge (PELCO easiGlow (Ted Pella, Inc.)) and incubated for 5 min. The excessive sample solution was removed by filter paper, after which the sample attached on carbon grid was further washed with water twice. Subsequently, the sample was negatively stained

with 5.0  $\mu\text{L}$  of 2% uranyl acetate solution for 15 s. The excess stain solution was immediately wicked away by filter paper, followed by characterization on JEM-2800 TEM operated at 200 kV. The statistical analysis of the yields are obtained from  $\sim 150$  Eoct-DOF dimers for each prescribed pattern.

### **Fluorescence monitoring of the space shift of AuNPs in the Eoct-DOF dimer**

The space shift of AuNPs in the Eoct-DOF dimer was monitored by real-time fluorescence analysis. Fluorescence measurements were performed on a Hitachi Fluorescence Spectrophotometer F-7000 with a 350  $\mu\text{L}$  quartz colorimetric ware. Monochromator was used for the selection of excitation and emission wavelength in the measurement. Briefly, the Anchor 1, 3, 4 and 6 were replaced by fluorescent FAM-, Cy3-, ROX- and Cy5-grafted Anchor 1, 3, 4 and 6, respectively, in the fabrication process of Eoct-DOF dimer (see Table S7 for the detailed sequences of fluorophore-modified anchor strands). The quadruple fluorophore-labeled DOCD solution for fluorescence measurement were prepared by mixing the obtained Eoct-DOF dimer (200  $\mu\text{L}$  5 nM) with closing strands 1-6 (0.4  $\mu\text{L}$  10  $\mu\text{M}$  for each strand) and ssDNA modified AuNPs (10  $\mu\text{L}$  200 nM). After the information strands “O2 O3” (0.6  $\mu\text{L}$  10  $\mu\text{M}$  for each strand) were added into the DOCD solution, the mixture was immediately placed into quartz colorimetric ware to monitor the fluorescence intensity of the four fluorophores ( $\lambda_{\text{ex}}(\text{FAM})$ : 490 nm,  $\lambda_{\text{em}}(\text{FAM})$ : 520 nm;  $\lambda_{\text{ex}}(\text{Cy3})$ : 540 nm,  $\lambda_{\text{em}}(\text{Cy3})$ : 560 nm;  $\lambda_{\text{ex}}(\text{ROX})$ : 575 nm,  $\lambda_{\text{em}}(\text{ROX})$ : 600 nm;  $\lambda_{\text{ex}}(\text{Cy5})$ : 640 nm,  $\lambda_{\text{em}}(\text{Cy5})$ : 660 nm). To acquire the kinetic data, fluorescence intensity was measured every 5 min. For each time point, it is necessary to manually switch the excitation and emission wavelength of the fluorescence spectrophotometer to record the intensities of four fluorophores in turn (each switching time around 5 s). After 30 min, the second set of information strands “O1 C3” (0.9  $\mu\text{L}$  10  $\mu\text{M}$  for each strand) were added into the mixture with the molar ratio of information strands to Eoct-DOF dimer at 9:1. The next set of information strands were added after another 30 min until addition of all information strands was completed. The amount of information strands was increased to 1.5 times compare to those added in the previous step. The volume change in each step was shown in Table S2.

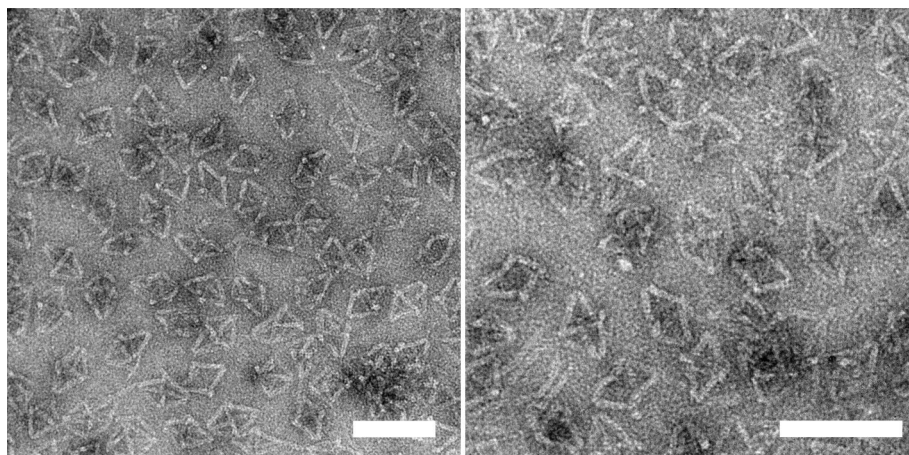

**Fig. S1.** The representative negative-stained TEM images of Eoct-DOFs. Scale bar: 100 nm.

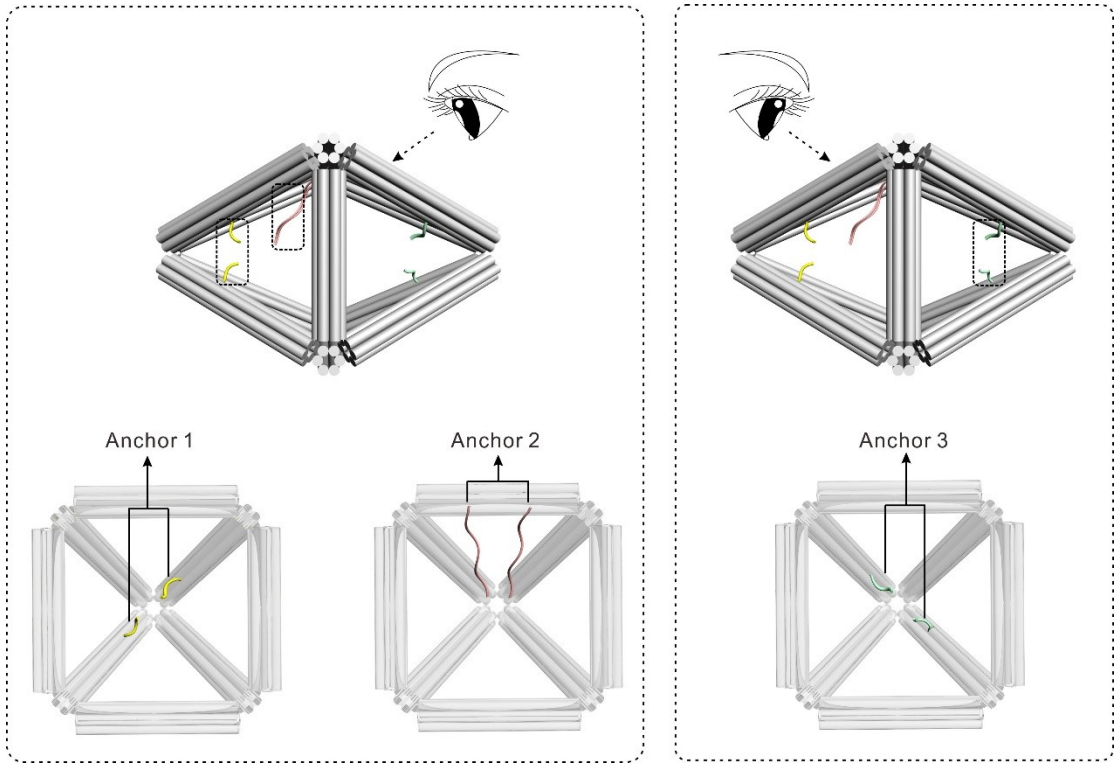

**Fig. S2.** The schematic position of three sets of anchor strands (Anchor 1, Anchor 2 and Anchor 3) extending from the edges to the interior of frame.



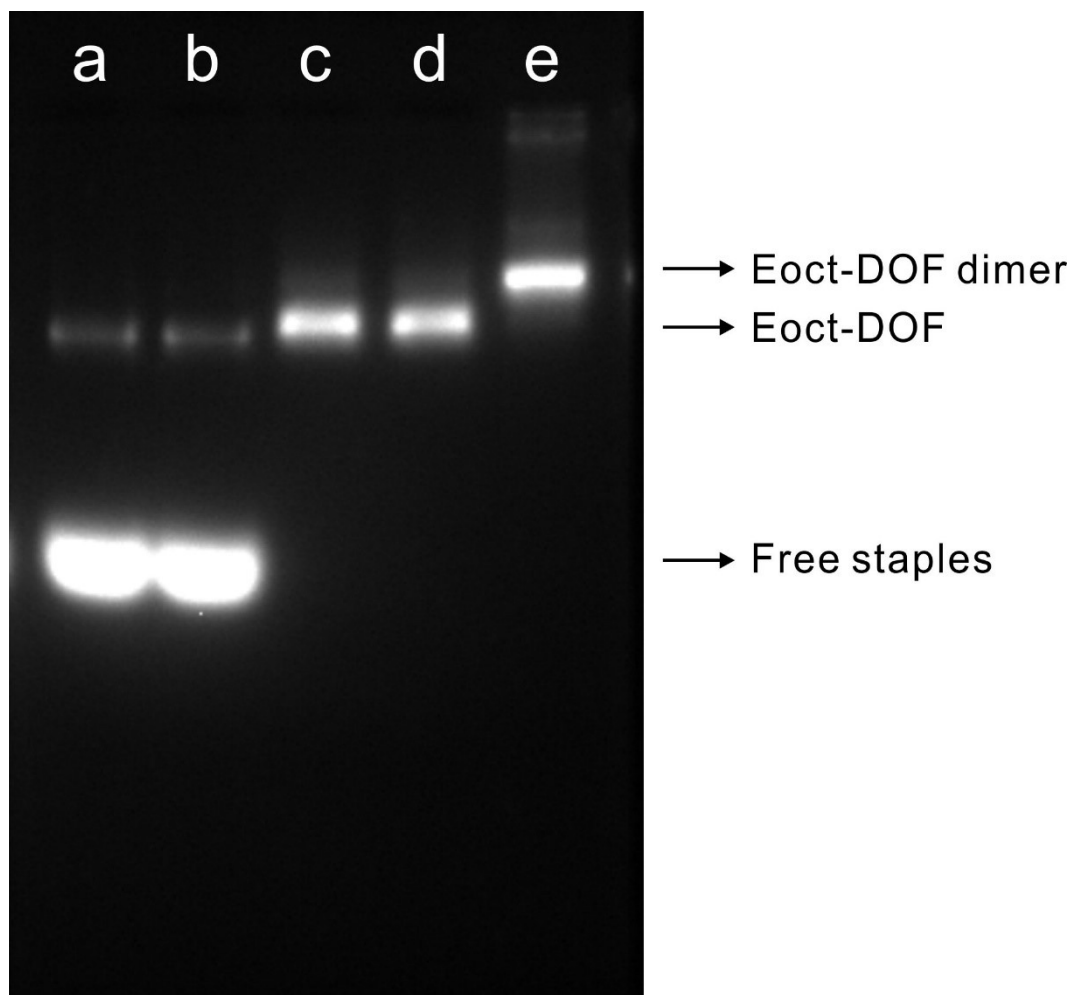

**Fig. S3.** 1% agarose gel image under UV light for Eoct-DOF A (a), Eoct-DOF B (b), PEG purified Eoct-DOF A (c), PEG purified Eoct-DOF B (d), and Eoct-DOF dimer (e).

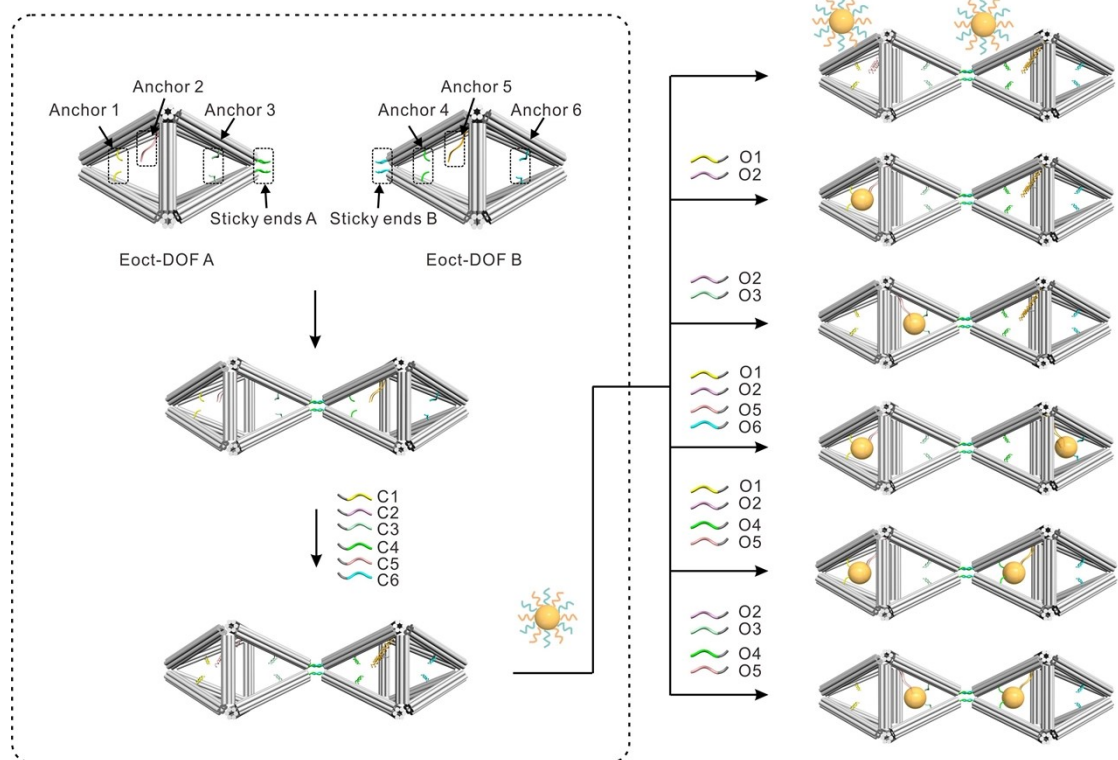

**Fig. S4.** Construction of the Eoct-DOF dimer and the six kinds of spatial distributions of AuNPs in the Eoct-DOF dimer in response to different input strands.

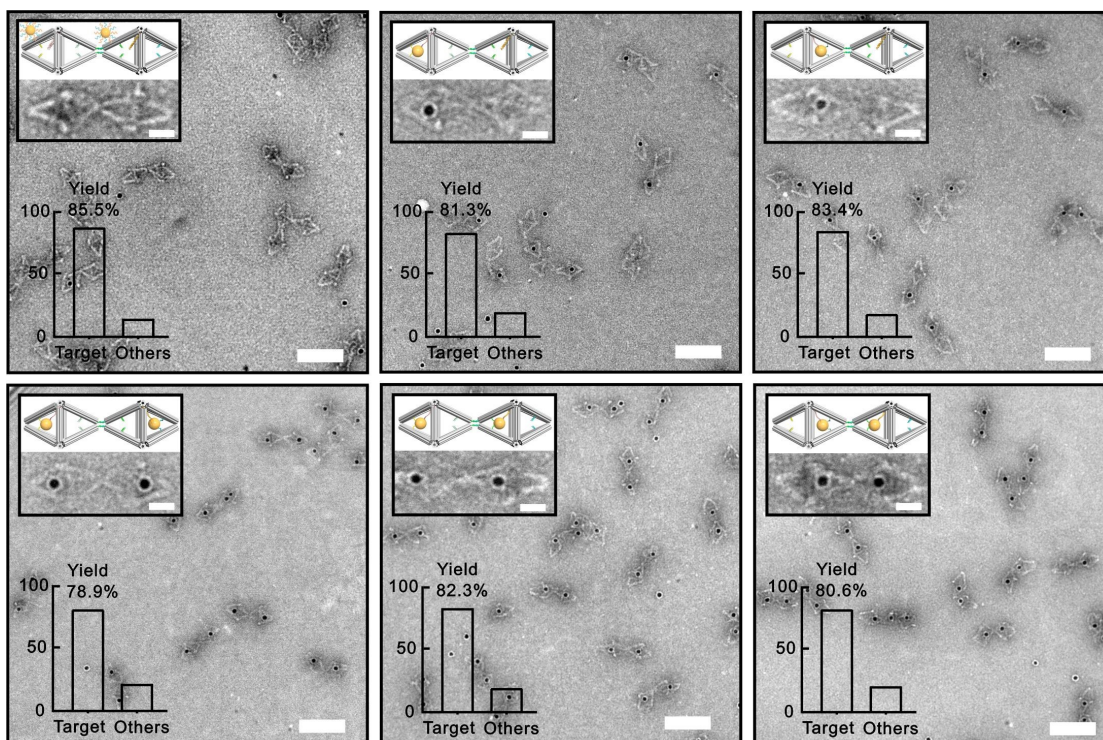

**Fig. S5.** The representative negative-stained TEM images of six switchable patterns of the DOCD. Insets show the population histograms for the prescribed target AuNPs-carrying Eoct-DOFs. “Target” and “Others” respectively represent the Eoct-DOF dimer structure consistent and inconsistent with the prescribed model. Scale bar: 100 nm (inset: 20 nm).

Code book:

|             |             |             |             |             |             |
|-------------|-------------|-------------|-------------|-------------|-------------|
| - → - = "A" | - → + = "B" | - → O = "C" | - → ⊖ = "D" | - → ⊕ = "E" | - → ⊗ = "F" |
| + → - = "G" | + → + = "H" | + → O = "I" | + → ⊖ = "J" | + → ⊕ = "K" | + → ⊗ = "L" |
| O → - = "M" | O → + = "N" | O → O = "O" | O → ⊖ = "P" | O → ⊕ = "Q" | O → ⊗ = "R" |
| ⊖ → - = "S" | ⊖ → + = "T" | ⊖ → O = "U" | ⊖ → ⊖ = "V" | ⊖ → ⊕ = "W" | ⊖ → ⊗ = "X" |
| ⊕ → - = "Y" | ⊕ → + = "Z" | ⊕ → O = "0" | ⊕ → ⊖ = "1" | ⊕ → ⊕ = "2" | ⊕ → ⊗ = "3" |
| ⊗ → - = "4" | ⊗ → + = "5" | ⊗ → O = "6" | ⊗ → ⊖ = "7" | ⊗ → ⊕ = "8" | ⊗ → ⊗ = "9" |

Key book:

| -           | +           | O           | ⊖           | ⊕           | ⊗           |   |
|-------------|-------------|-------------|-------------|-------------|-------------|---|
| U           | C1 C2       | C2 C3       | C1 C2 C5 C6 | C1 C2 C4 C5 | C2 C3 C4 C5 | - |
| O1 O2       | U           | O1 C3       | C5 C6       | C4 C5       | O1 C3 C4 C5 | + |
| O2 O3       | C1 O3       | U           | C1 O3 C5 C6 | C1 O3 C4 C5 | C4 C5       | O |
| O1 O2 O5 O6 | O5 O6       | O1 C3 O5 O6 | U           | C4 O6       | O1 C3 C4 O6 | ⊖ |
| O1 O2 O4 O5 | O4 O5       | O1 C3 O4 O5 | O4 C6       | U           | O1 C3       | ⊕ |
| O2 O3 O4 O5 | C1 O3 O4 O5 | O4 O5       | C1 O3 O4 C6 | C1 O3       | U           | ⊗ |

U → Poly T

O → Opening strand

C → Closing strand

**Fig. S6.** The code book defining the transition of cipher symbols as 36 characters and the key book indicating the information strands required for each transition. For example, accomplishment of the transition “+ → - ” requires the addition of the information strands “C1 C2”.

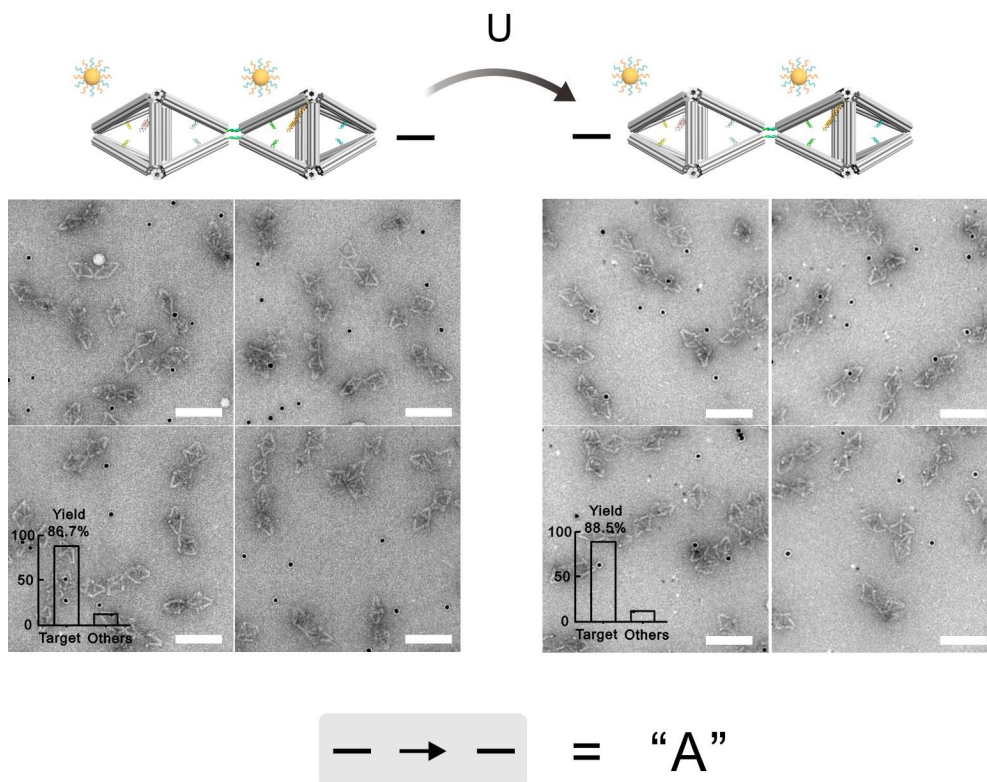

**Fig. S7.** Schematic and corresponding representative negative-stained TEM images of the DOCD undergoing the transition “— → — ” activated by information strand “U” for exporting the letter “A”. Insets show the population histograms for the prescribed target AuNPs-carrying Eoct-DOFs. “Target” and “Others” respectively represent the Eoct-DOF dimer structure consistent and inconsistent with the prescribed model. Scale bar: 100 nm.

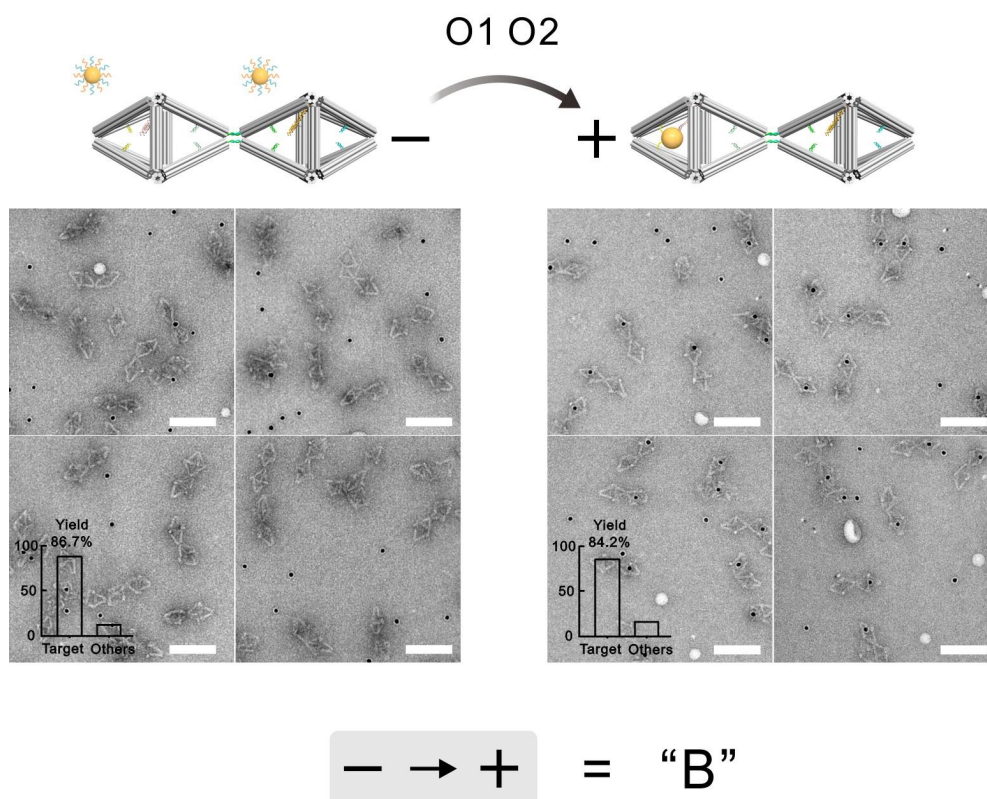

**Fig. S8.** Schematic and corresponding representative negative-stained TEM images of the DOCD undergoing the transition “- →+ ” activated by information strands “O1 O2” for exporting the letter “B”. Insets show the population histograms for the prescribed target AuNPs-carrying Eoct-DOFs. “Target” and “Others” respectively represent the Eoct-DOF dimer structure consistent and inconsistent with the prescribed model. Scale bar: 100 nm.

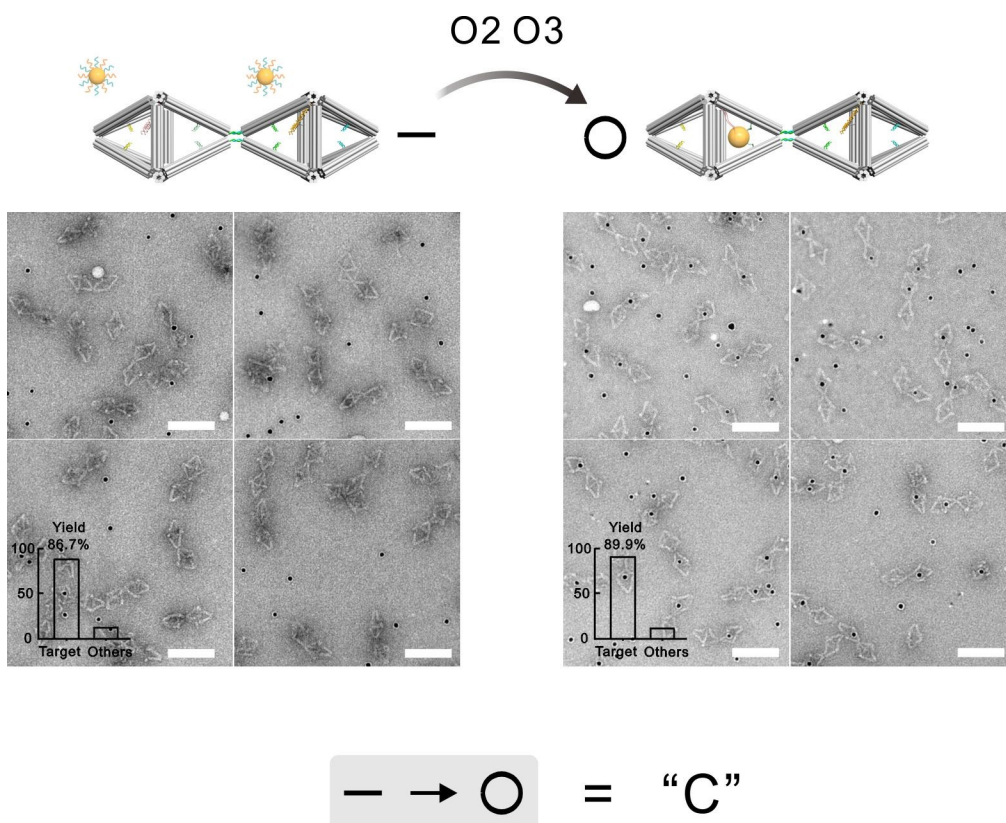

**Fig. S9.** Schematic and corresponding representative negative-stained TEM images of the DOCD undergoing the transition “— →○” activated by information strands “O2 O3” for exporting the letter “C”. Insets show the population histograms for the prescribed target AuNPs-carrying Eoct-DOFs. “Target” and “Others” respectively represent the Eoct-DOF dimer structure consistent and inconsistent with the prescribed model. Scale bar: 100 nm.

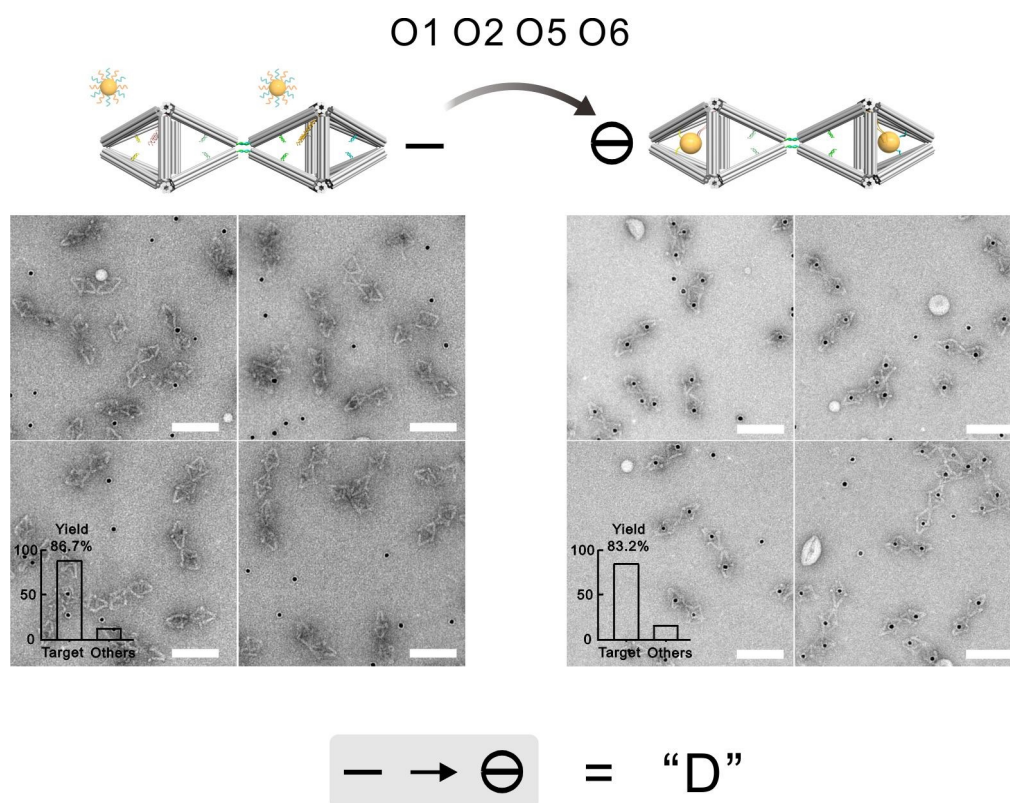

**Fig. S10.** Schematic and corresponding representative negative-stained TEM images of the DOCD undergoing the transition “ $- \rightarrow \ominus$ ” activated by information strands “O1 O2 O5 O6” for exporting the letter “D”. Insets show the population histograms for the prescribed target AuNPs-carrying Eoct-DOFs. “Target” and “Others” respectively represent the Eoct-DOF dimer structure consistent and inconsistent with the prescribed model. Scale bar: 100 nm.



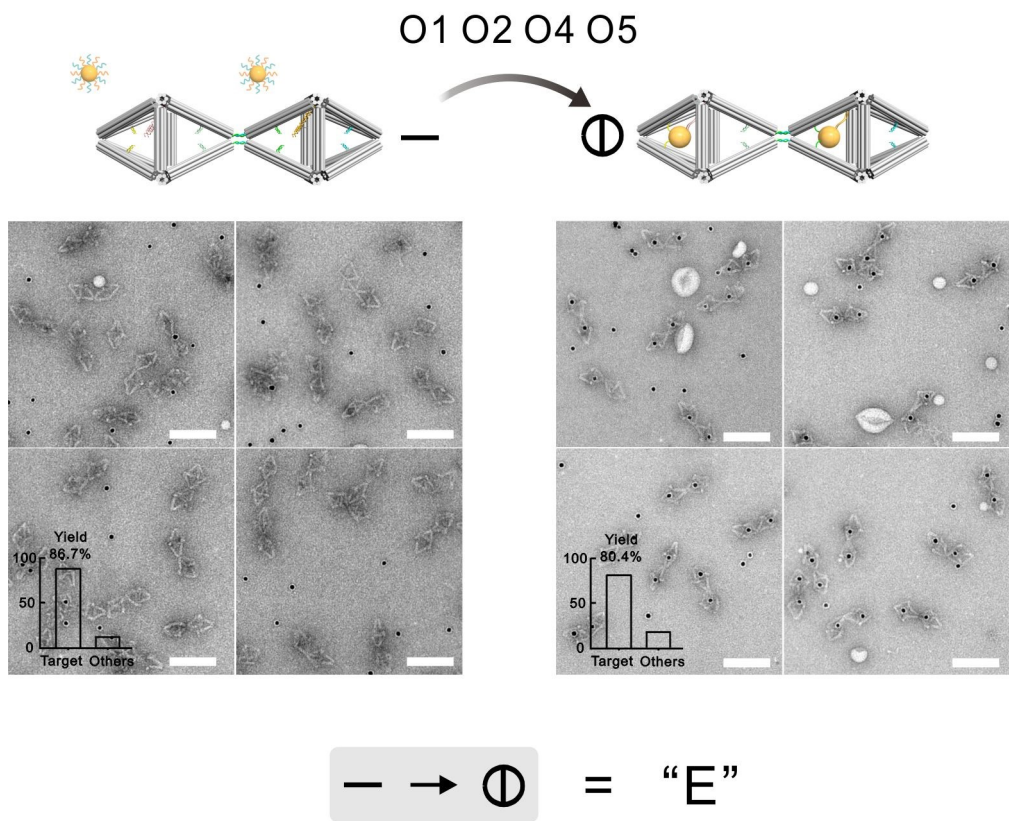

**Fig. S11.** Schematic and corresponding representative negative-stained TEM images of the DOCD undergoing the transition “ $\text{---} \rightarrow \textcircled{\text{E}}$ ” activated by information strands “O1 O2 O4 O5” for exporting the letter “E”. Insets show the population histograms for the prescribed target AuNPs-carrying Eoct-DOFs. “Target” and “Others” respectively represent the Eoct-DOF dimer structure consistent and inconsistent with the prescribed model. Scale bar: 100 nm.

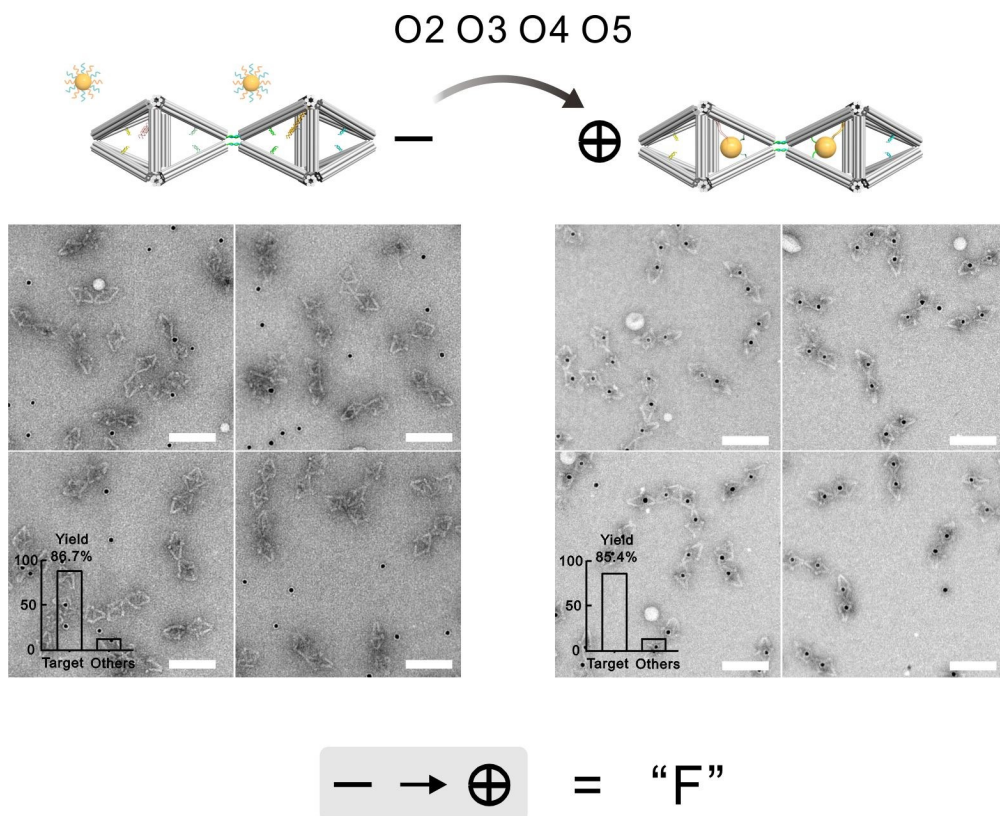

**Fig. S12.** Schematic and corresponding representative negative-stained TEM images of the DOCD undergoing the transition “ $- \rightarrow \oplus$ ” activated by information strands “O2 O3 O4 O5” for exporting the letter “F”. Insets show the population histograms for the prescribed target AuNPs-carrying Eoct-DOFs. “Target” and “Others” respectively represent the Eoct-DOF dimer structure consistent and inconsistent with the prescribed model. Scale bar: 100 nm.

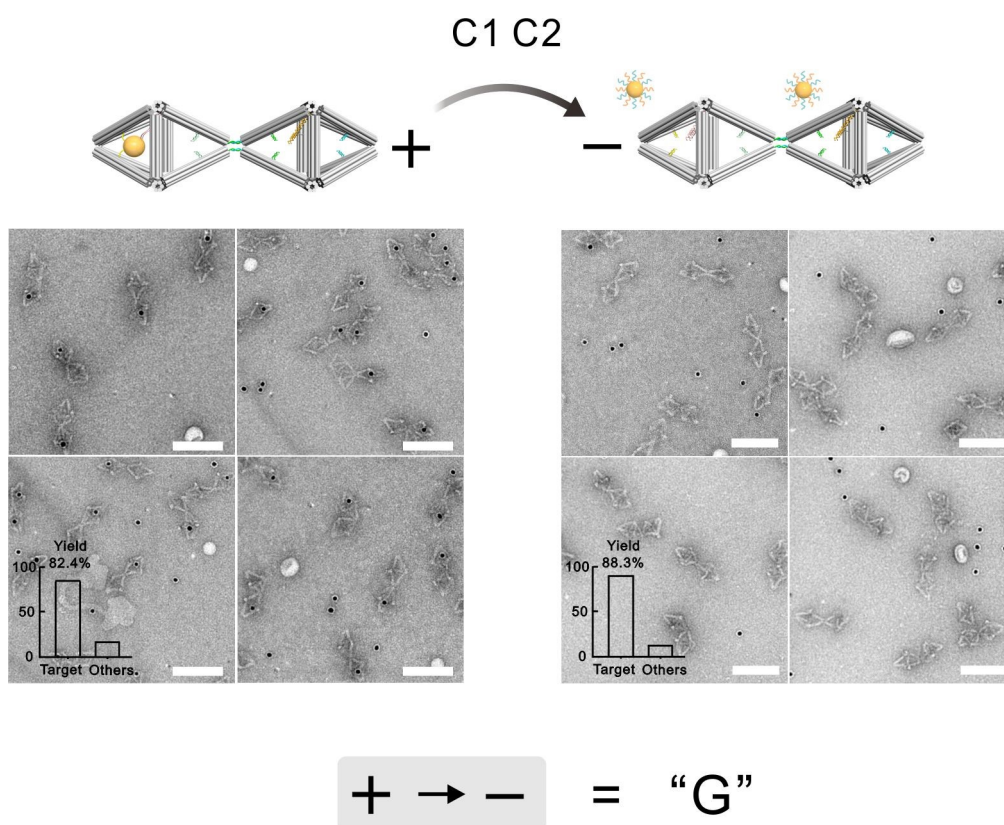

**Fig. S13.** Schematic and corresponding representative negative-stained TEM images of the DOCD undergoing the transition “+ →- ” activated by information strands “C1 C2” for exporting the letter “G”. Insets show the population histograms for the prescribed target AuNPs-carrying Eoct-DOFs. “Target” and “Others” respectively represent the Eoct-DOF dimer structure consistent and inconsistent with the prescribed model. Scale bar: 100 nm.

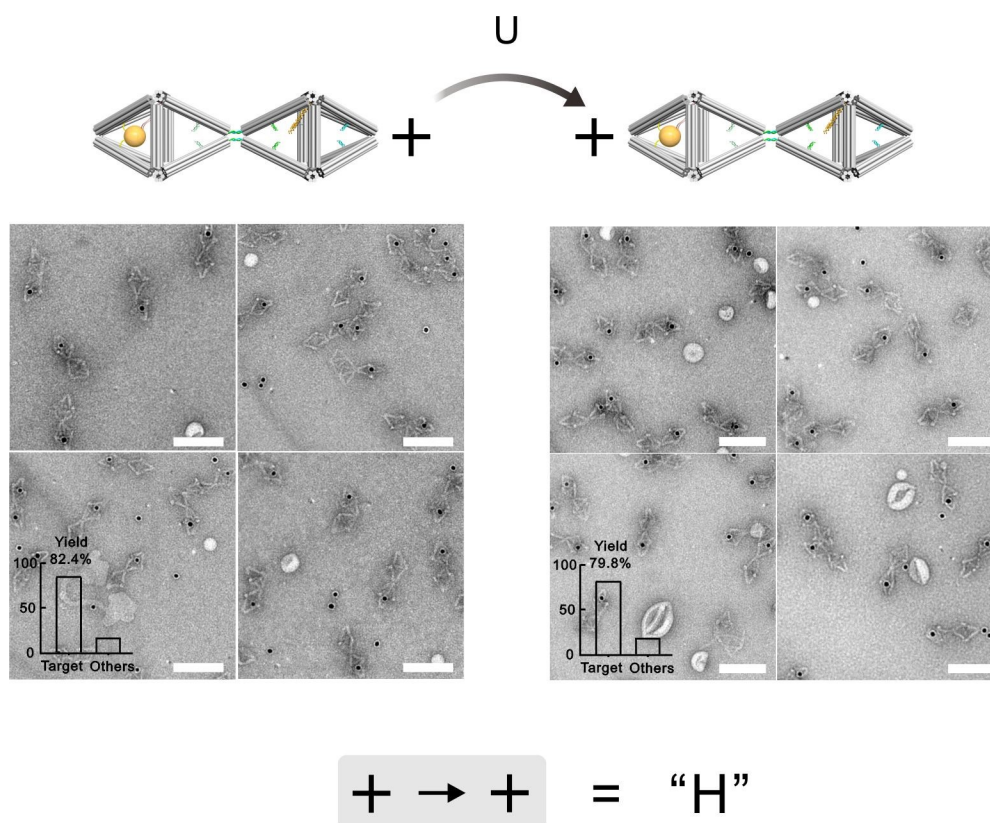

**Fig. S14.** Schematic and corresponding representative negative-stained TEM images of the DOCD undergoing the transition “+ →+ ” activated by information strand “U” for exporting the letter “H”. Insets show the population histograms for the prescribed target AuNPs-carrying Eoct-DOFs. “Target” and “Others” respectively represent the Eoct-DOF dimer structure consistent and inconsistent with the prescribed model. Scale bar: 100 nm.

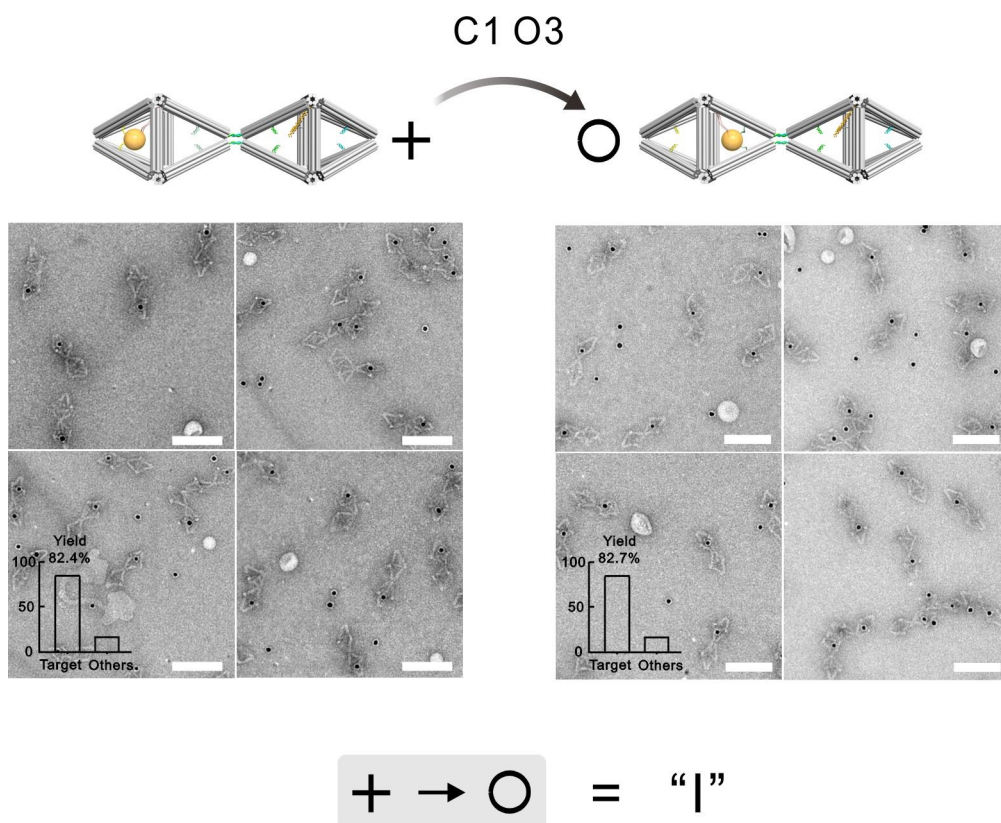

**Fig. S15.** Schematic and corresponding representative negative-stained TEM images of the DOCD undergoing the transition “+ →○ ” activated by information strands “C1 O3” for exporting the letter “I”. Insets show the population histograms for the prescribed target AuNPs-carrying Eoct-DOFs. “Target” and “Others” respectively represent the Eoct-DOF dimer structure consistent and inconsistent with the prescribed model. Scale bar: 100 nm.

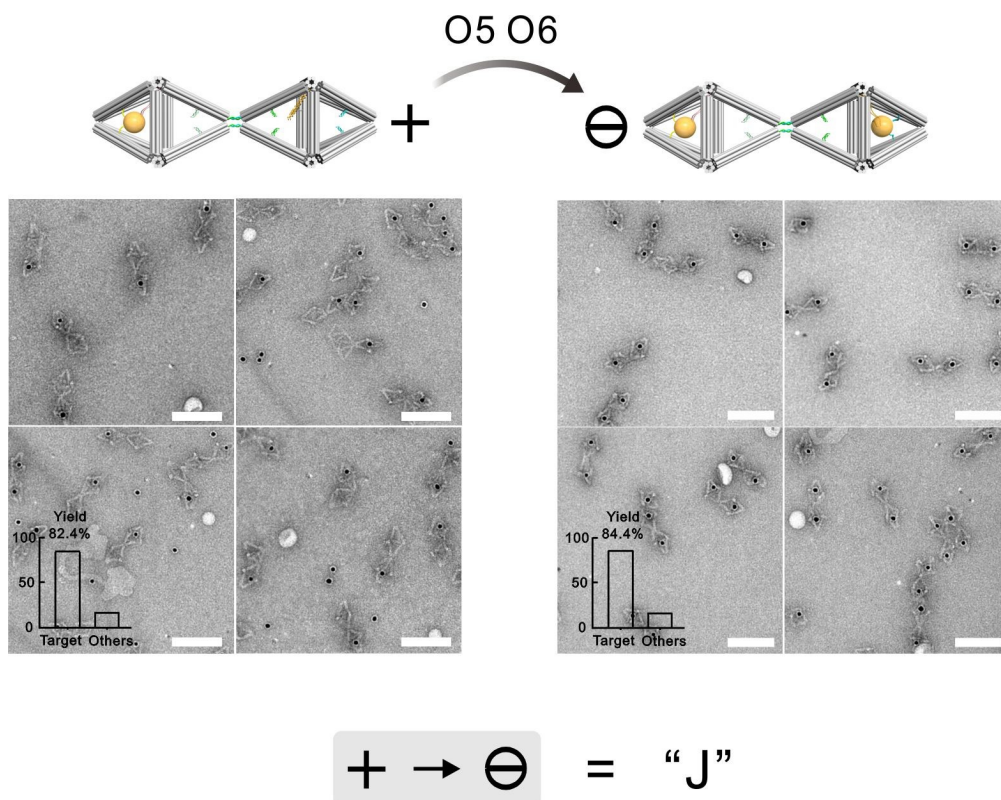

**Fig. S16.** Schematic and corresponding representative negative-stained TEM images of the DOCD undergoing the transition “+  $\rightarrow$   $\ominus$ ” activated by information strands “O5 O6” for exporting the letter “J”. Insets show the population histograms for the prescribed target AuNPs-carrying Eoct-DOFs. “Target” and “Others” respectively represent the Eoct-DOF dimer structure consistent and inconsistent with the prescribed model. Scale bar: 100 nm.

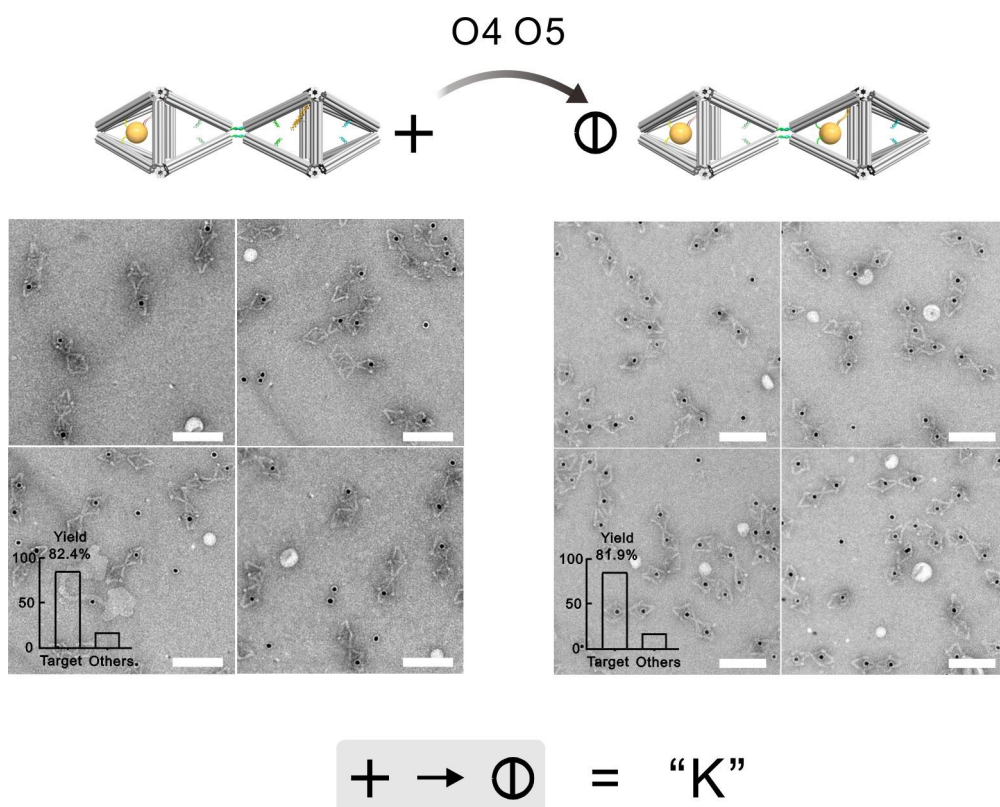

**Fig. S17.** Schematic and corresponding representative negative-stained TEM images of the DOCD undergoing the transition “+ → ⊕” activated by information strands “O4 O5” for exporting the letter “K”. Insets show the population histograms for the prescribed target AuNPs-carrying Eoct-DOFs. “Target” and “Others” respectively represent the Eoct-DOF dimer structure consistent and inconsistent with the prescribed model. Scale bar: 100 nm.

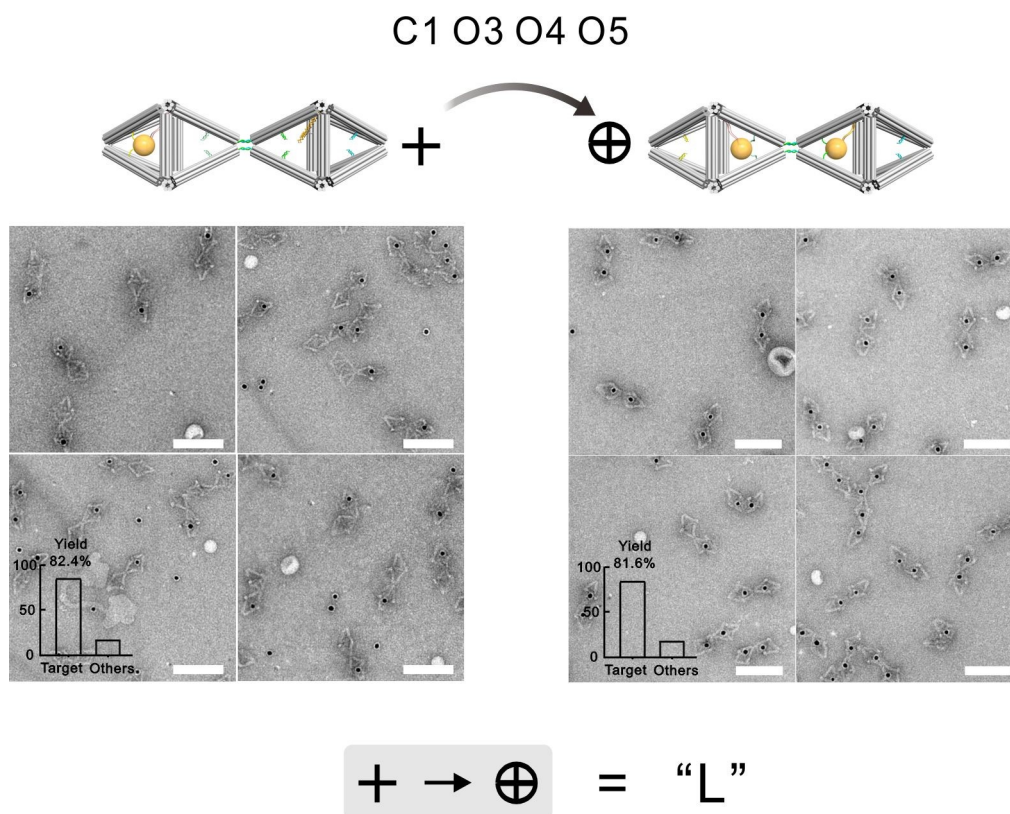

**Fig. S18.** Schematic and corresponding representative negative-stained TEM images of the DOCD undergoing the transition “+ →⊕” activated by information strands “C1 O3 O4 O5” for exporting the letter “L”. Insets show the population histograms for the prescribed target AuNPs-carrying Eoct-DOFs. “Target” and “Others” respectively represent the Eoct-DOF dimer structure consistent and inconsistent with the prescribed model. Scale bar: 100 nm.



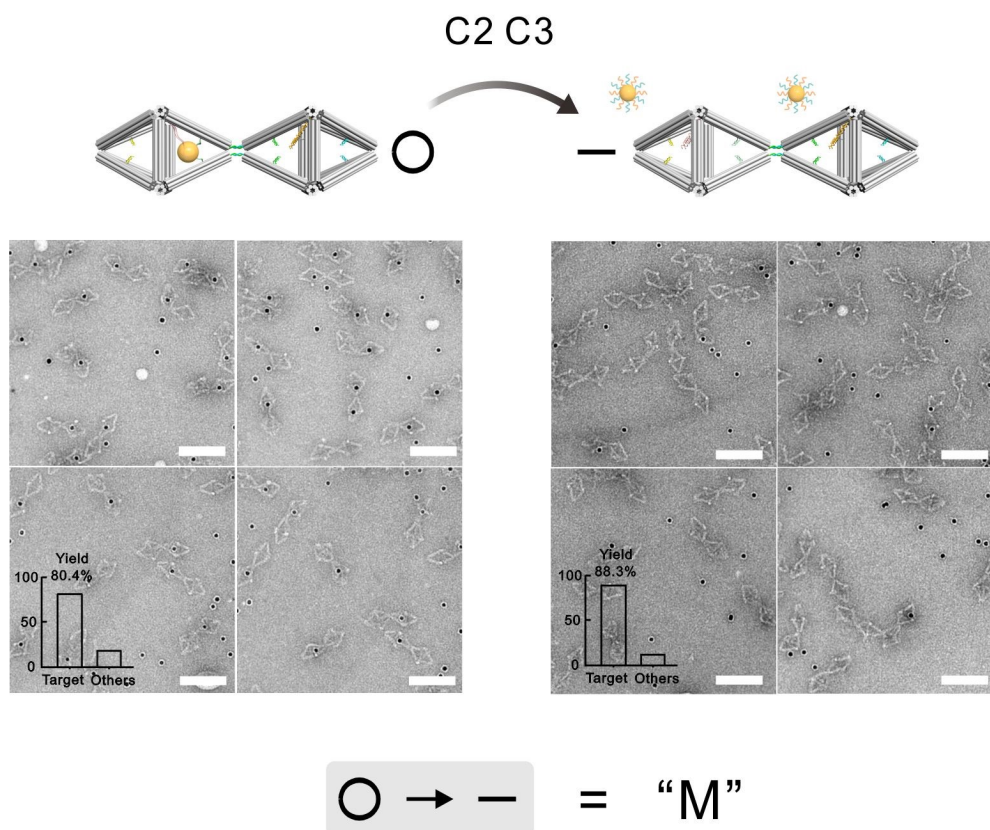

**Fig. S19.** Schematic and corresponding representative negative-stained TEM images of the DOCD undergoing the transition “○ → — ” activated by information strands “C2 C3” for exporting the letter “M”. Insets show the population histograms for the prescribed target AuNPs-carrying Eoct-DOFs. “Target” and “Others” respectively represent the Eoct-DOF dimer structure consistent and inconsistent with the prescribed model. Scale bar: 100 nm.

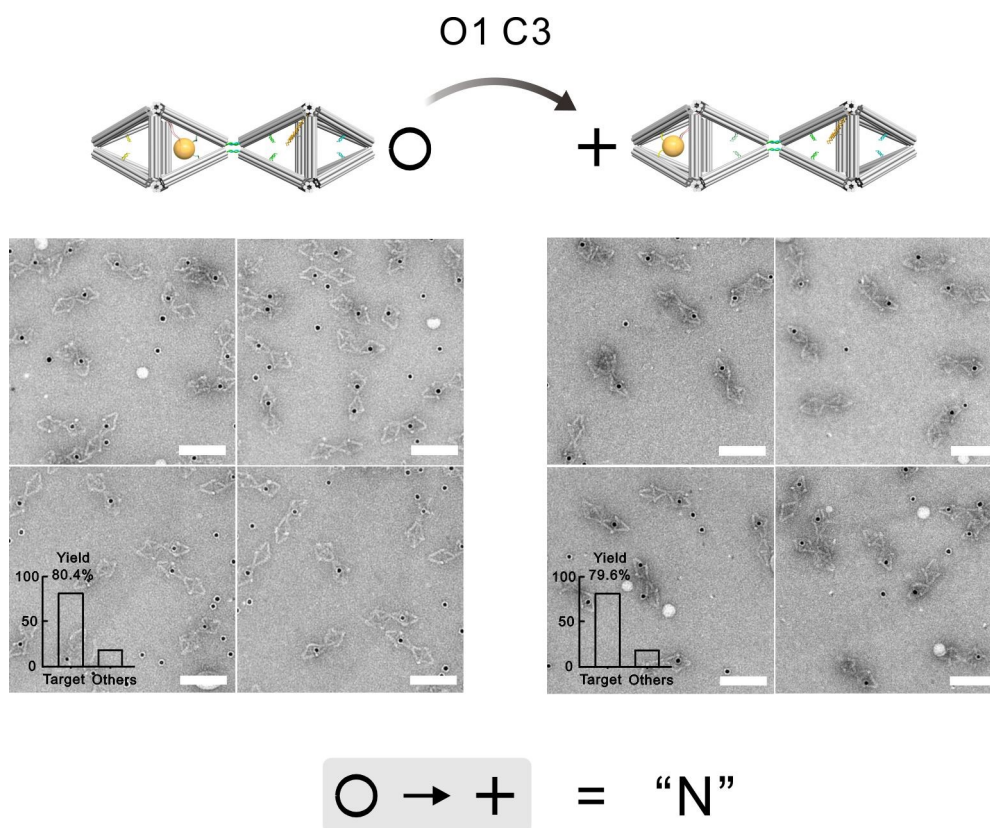

**Fig. S20.** Schematic and corresponding representative negative-stained TEM images of the DOCD undergoing the transition “○ → + ” activated by information strands “O1 C3” for exporting the letter “N”. Insets show the population histograms for the prescribed target AuNPs-carrying Eoct-DOFs. “Target” and “Others” respectively represent the Eoct-DOF dimer structure consistent and inconsistent with the prescribed model. Scale bar: 100 nm.

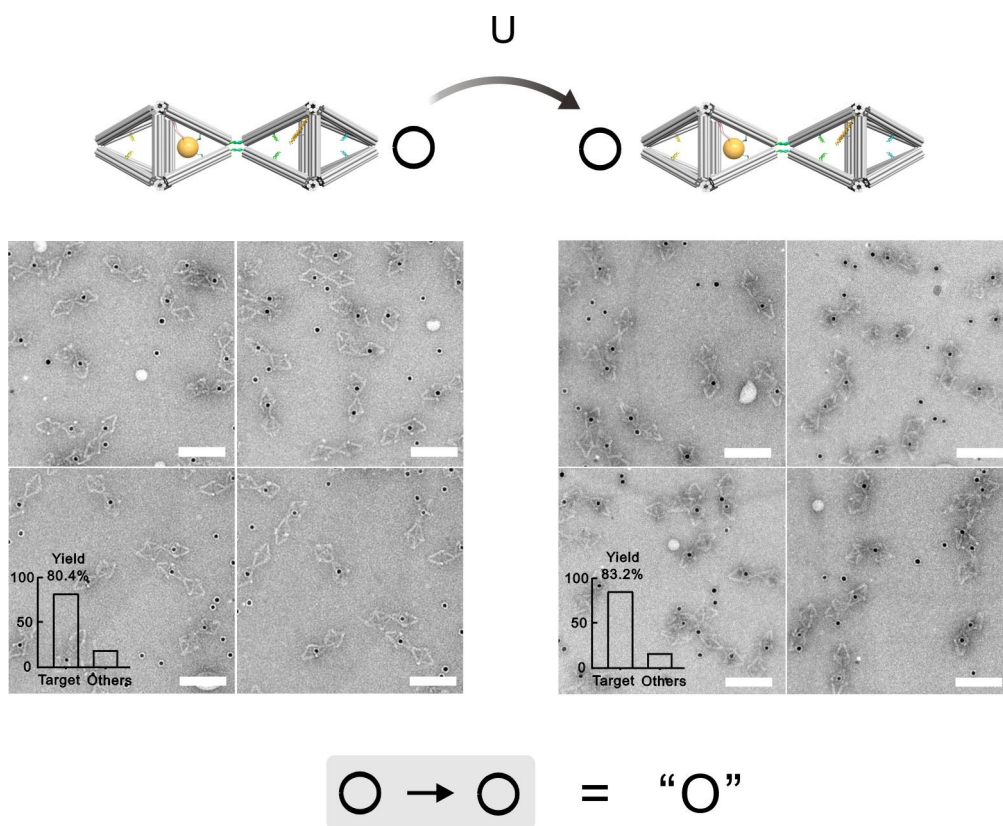

**Fig. S21.** Schematic and corresponding representative negative-stained TEM images of the DOCD undergoing the transition “ $\text{O} \rightarrow \text{O}$ ” activated by information strand “U” for exporting the letter “O”. Insets show the population histograms for the prescribed target AuNPs-carrying Eoct-DOFs. “Target” and “Others” respectively represent the Eoct-DOF dimer structure consistent and inconsistent with the prescribed model. Scale bar: 100 nm.

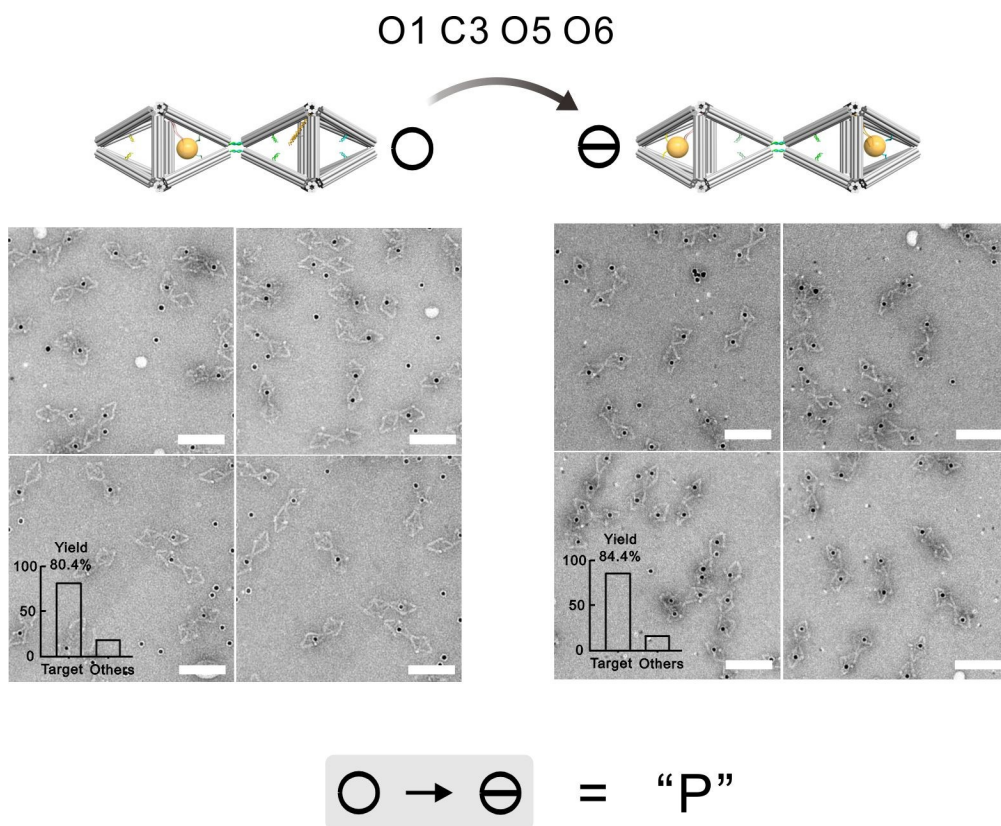

**Fig. S22.** Schematic and corresponding representative negative-stained TEM images of the DOCD undergoing the transition “ $\bigcirc \rightarrow \ominus$ ” activated by information strands “O1 C3 O5 O6” for exporting the letter “P”. Insets show the population histograms for the prescribed target AuNPs-carrying Eoct-DOFs. “Target” and “Others” respectively represent the Eoct-DOF dimer structure consistent and inconsistent with the prescribed model. Scale bar: 100 nm.

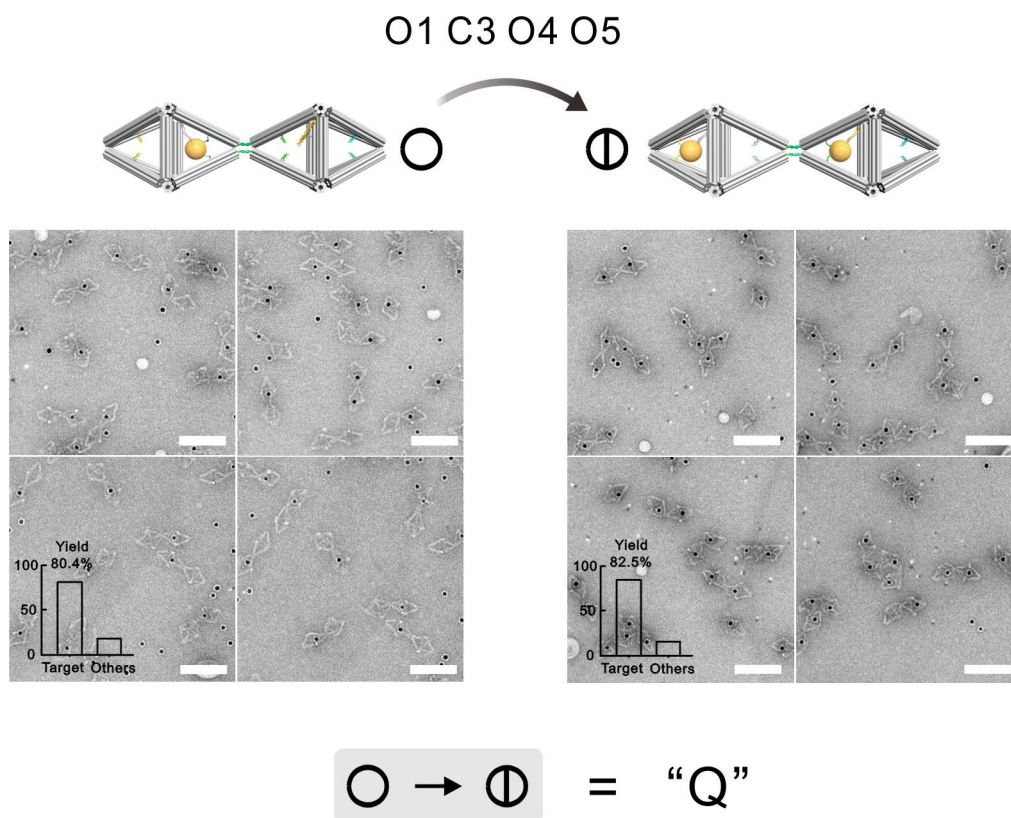

**Fig. S23.** Schematic and corresponding representative negative-stained TEM images of the DOCD undergoing the transition “ $\bigcirc \rightarrow \bigoplus$ ” activated by information strands “O1 C3 O4 O5” for exporting the letter “Q”. Insets show the population histograms for the prescribed target AuNPs-carrying Eoct-DOFs. “Target” and “Others” respectively represent the Eoct-DOF dimer structure consistent and inconsistent with the prescribed model. Scale bar: 100 nm.

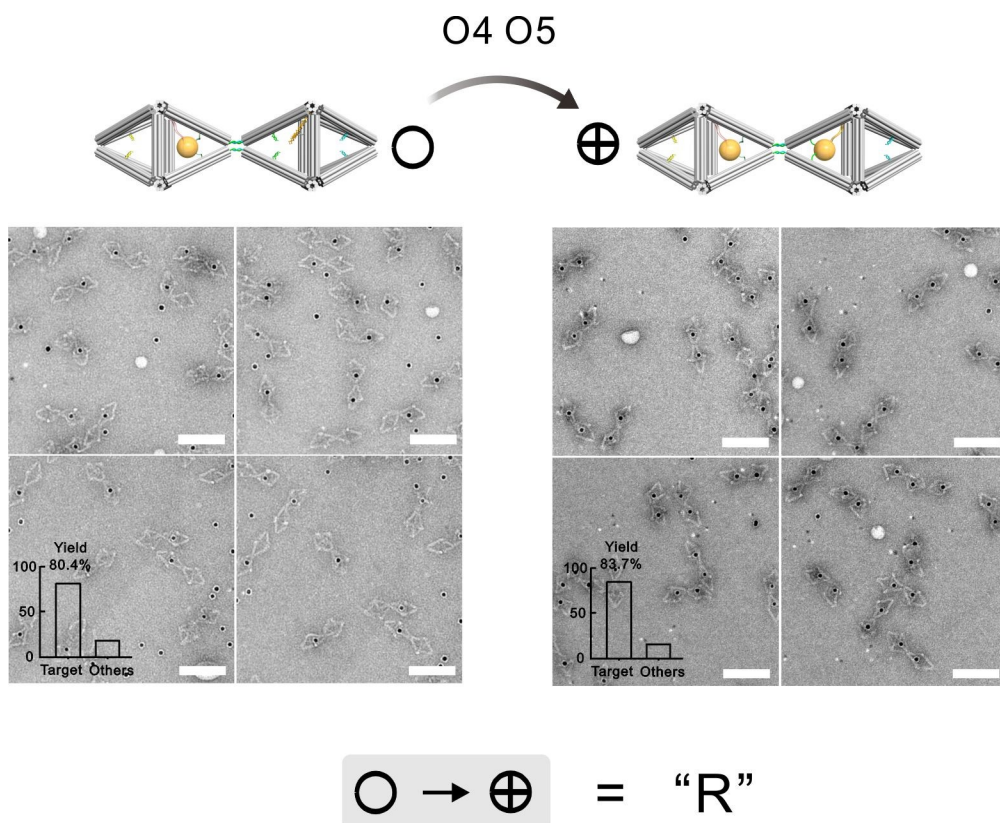

**Fig. S24.** Schematic and corresponding representative negative-stained TEM images of the DOCD undergoing the transition “○ → ⊕” activated by information strands “O4 O5” for exporting the letter “R”. Insets show the population histograms for the prescribed target AuNPs-carrying Eoct-DOFs. “Target” and “Others” respectively represent the Eoct-DOF dimer structure consistent and inconsistent with the prescribed model. Scale bar: 100 nm.

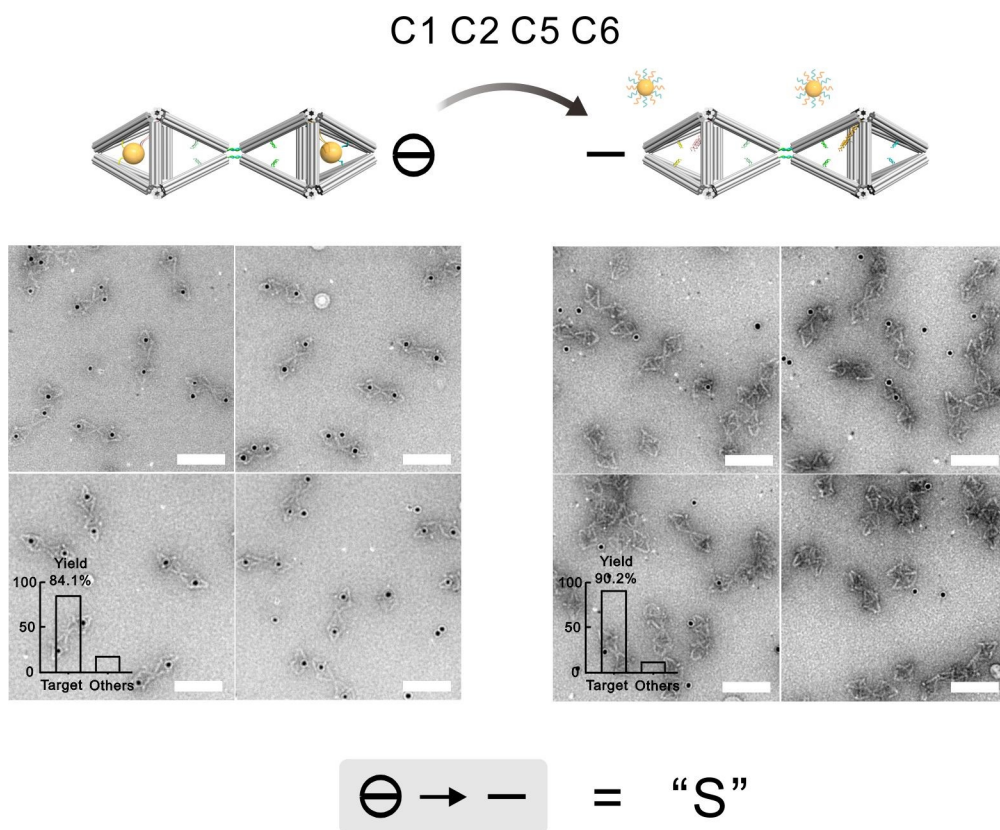

**Fig. S25.** Schematic and corresponding representative negative-stained TEM images of the DOCD undergoing the transition “ $\ominus \rightarrow -$ ” activated by information strands “C1 C2 C5 C6” for exporting the letter “S”. Insets show the population histograms for the prescribed target AuNPs-carrying Eoct-DOFs. “Target” and “Others” respectively represent the Eoct-DOF dimer structure consistent and inconsistent with the prescribed model. Scale bar: 100 nm.

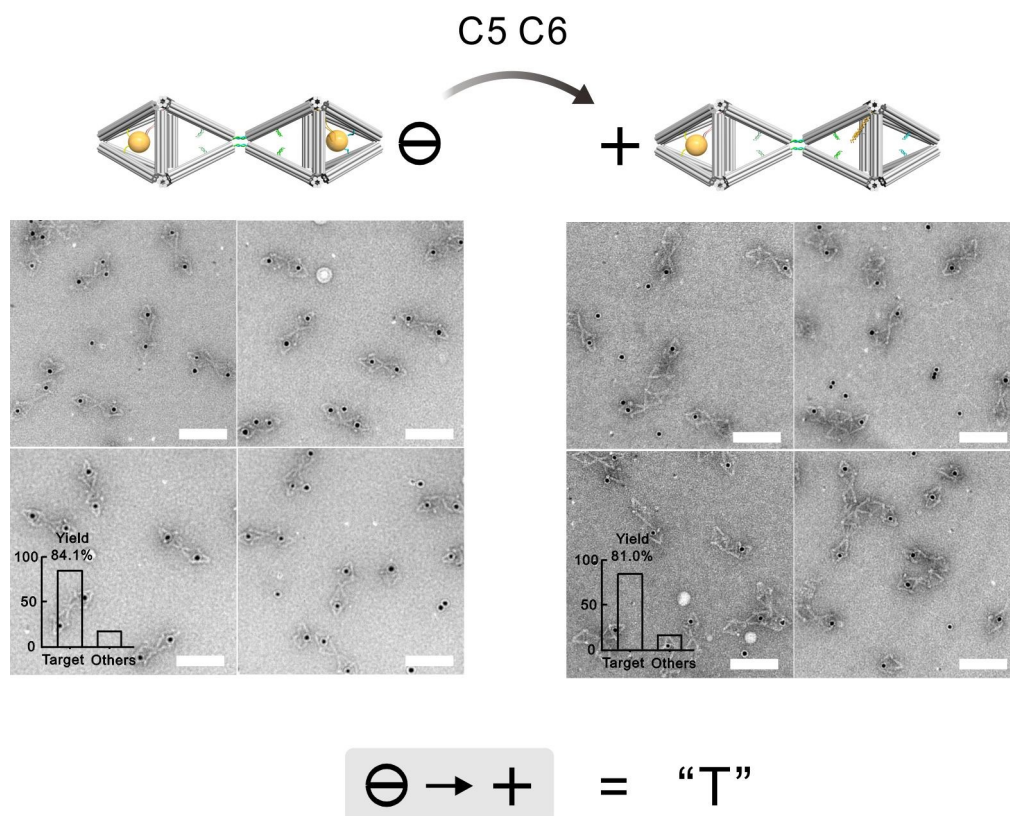

**Fig. S26.** Schematic and corresponding representative negative-stained TEM images of the DOCD undergoing the transition “ $\ominus \rightarrow +$ ” activated by information strands “C5 C6” for exporting the letter “T”. Insets show the population histograms for the prescribed target AuNPs-carrying Eoct-DOFs. “Target” and “Others” respectively represent the Eoct-DOF dimer structure consistent and inconsistent with the prescribed model. Scale bar: 100 nm.



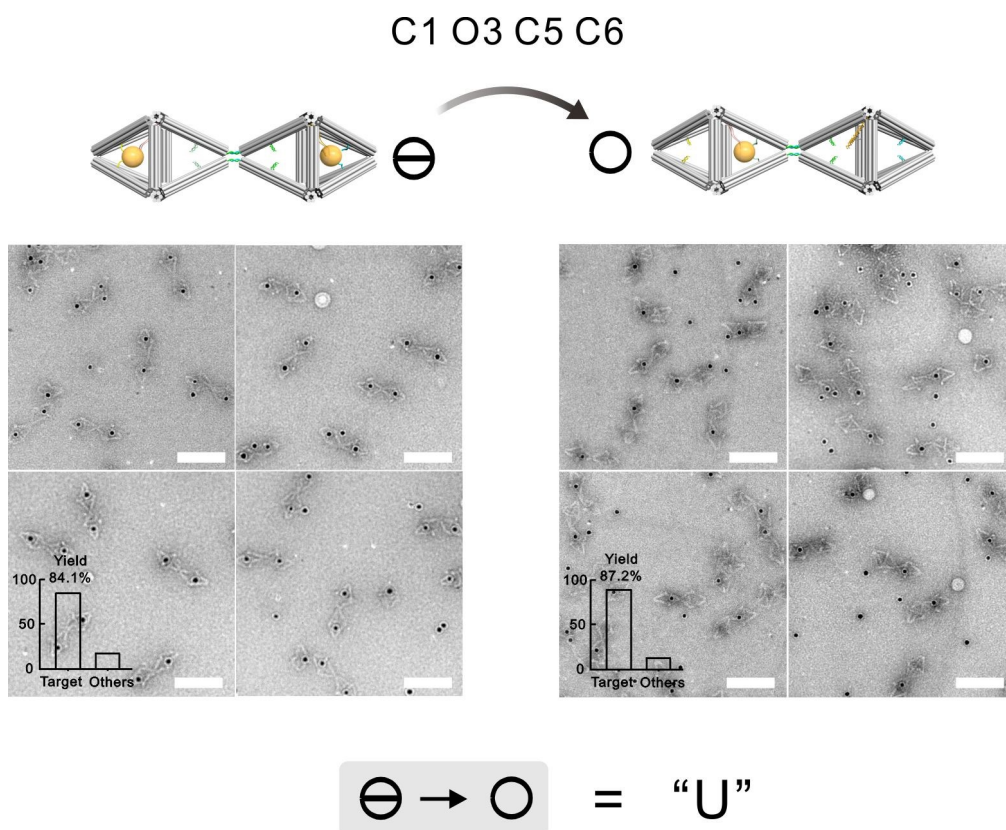

**Fig. S27.** Schematic and corresponding representative negative-stained TEM images of the DOCD undergoing the transition “ $\ominus \rightarrow \circ$ ” activated by information strands “C1 O3 C5 C6” for exporting the letter “U”. Insets show the population histograms for the prescribed target AuNPs-carrying Eoct-DOFs. “Target” and “Others” respectively represent the Eoct-DOF dimer structure consistent and inconsistent with the prescribed model. Scale bar: 100 nm.

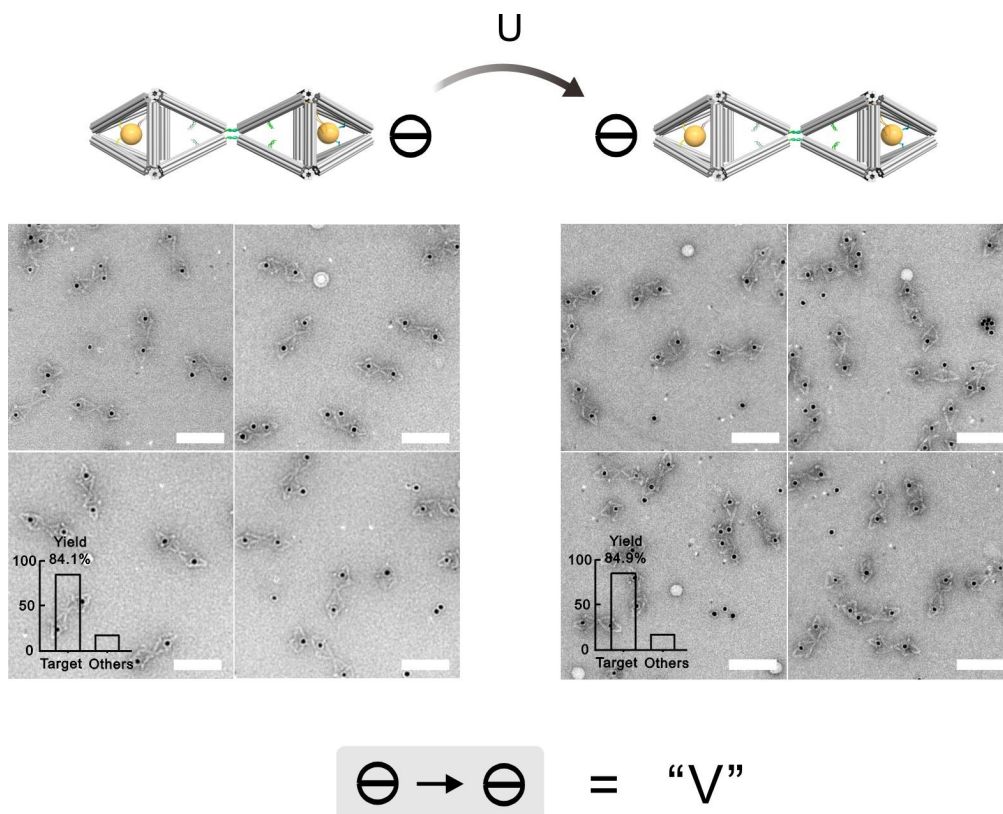

**Fig. S28.** Schematic and corresponding representative negative-stained TEM images of the DOCD undergoing the transition “ $\ominus \rightarrow \ominus$ ” activated by information strand “U” for exporting the letter “V”. Insets show the population histograms for the prescribed target AuNPs-carrying Eoct-DOFs. “Target” and “Others” respectively represent the Eoct-DOF dimer structure consistent and inconsistent with the prescribed model. Scale bar: 100 nm.

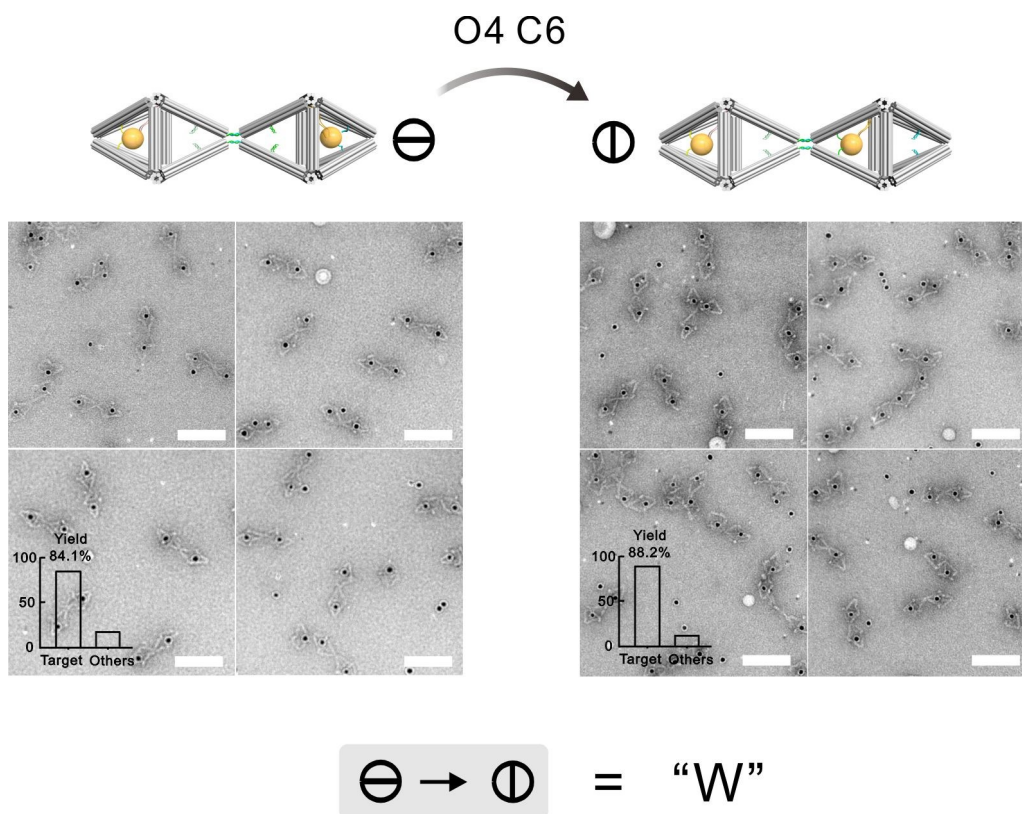

**Fig. S29.** Schematic and corresponding representative negative-stained TEM images of the DOCD undergoing the transition “ $\ominus \rightarrow \oplus$ ” activated by information strands “O4 C6” for exporting the letter “W”. Insets show the population histograms for the prescribed target AuNPs-carrying Eoct-DOFs. “Target” and “Others” respectively represent the Eoct-DOF dimer structure consistent and inconsistent with the prescribed model. Scale bar: 100 nm.

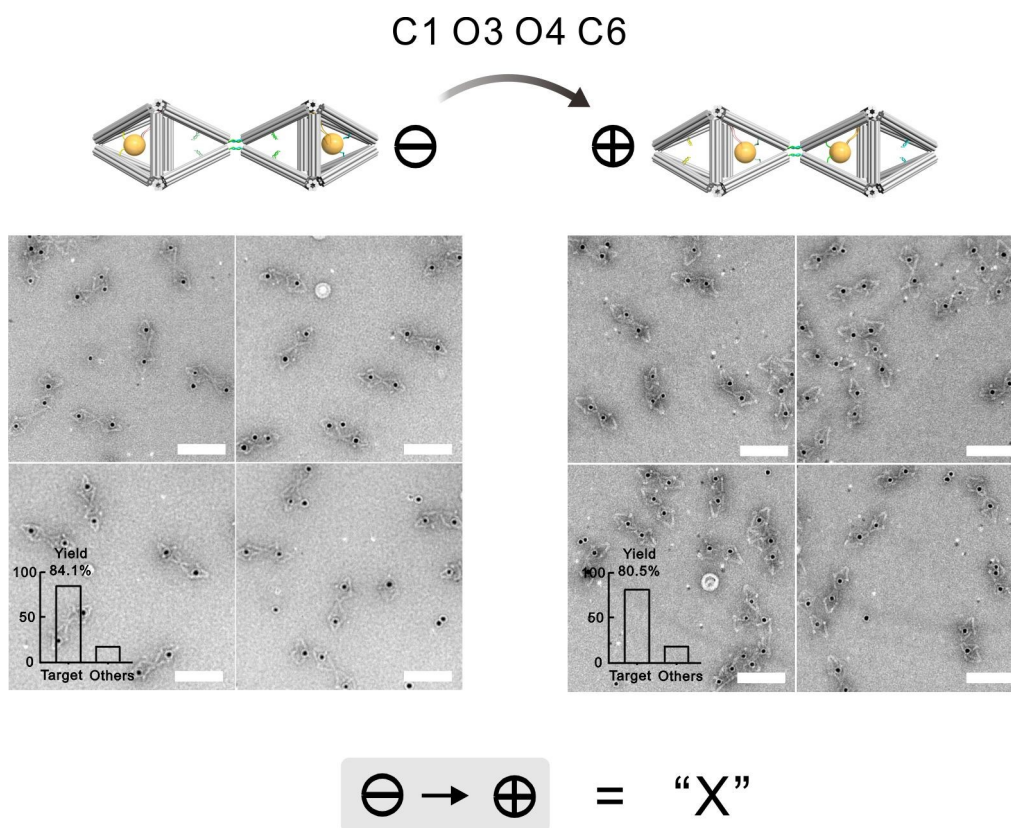

**Fig. S30.** Schematic and corresponding representative negative-stained TEM images of the DOCD undergoing the transition “ $\ominus \rightarrow \oplus$ ” activated by information strands “C1 O3 O4 C6” for exporting the letter “X”. Insets show the population histograms for the prescribed target AuNPs-carrying Eoct-DOFs. “Target” and “Others” respectively represent the Eoct-DOF dimer structure consistent and inconsistent with the prescribed model. Scale bar: 100 nm.

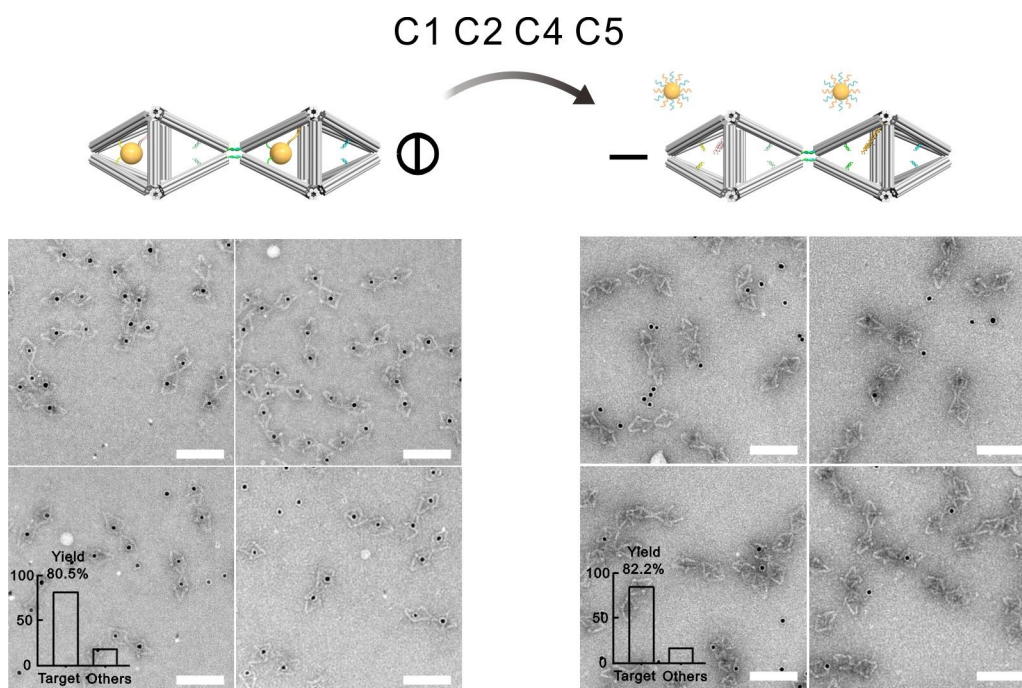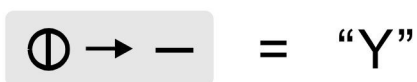

**Fig. S31.** Schematic and corresponding representative negative-stained TEM images of the DOCD undergoing the transition “ $\oplus \rightarrow -$ ” activated by information strands “C1 C2 C4 C5” for exporting the letter “Y”. Insets show the population histograms for the prescribed target AuNPs-carrying Eoct-DOFs. “Target” and “Others” respectively represent the Eoct-DOF dimer structure consistent and inconsistent with the prescribed model. Scale bar: 100 nm.

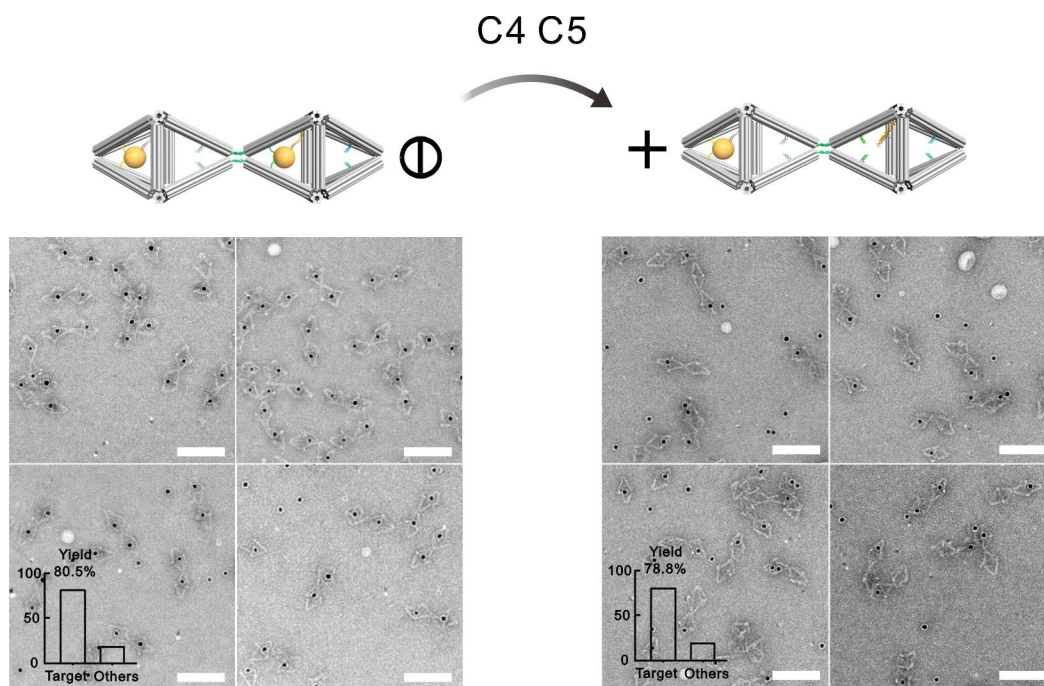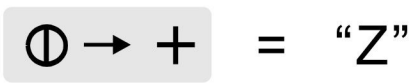

**Fig. S32.** Schematic and corresponding representative negative-stained TEM images of the DOCD undergoing the transition “ $\ominus \rightarrow +$ ” activated by information strands “C4 C5” for exporting the letter “Z”. Insets show the population histograms for the prescribed target AuNPs-carrying Eoct-DOFs. “Target” and “Others” respectively represent the Eoct-DOF dimer structure consistent and inconsistent with the prescribed model. Scale bar: 100 nm.

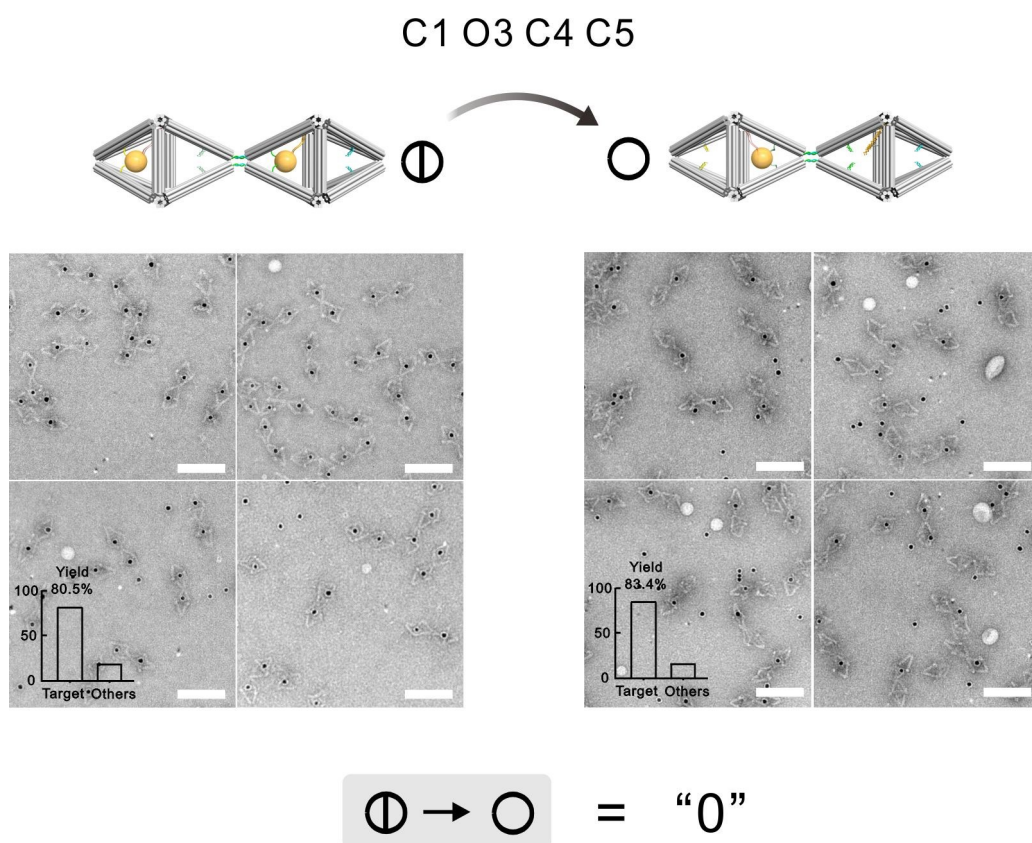

**Fig. S33.** Schematic and corresponding representative negative-stained TEM images of the DOCD undergoing the transition “ $\ominus \rightarrow \circ$ ” activated by information strands “C1 O3 C4 C5” for exporting the Arabic numeral “0”. Insets show the population histograms for the prescribed target AuNPs-carrying Eoct-DOFs. “Target” and “Others” respectively represent the Eoct-DOF dimer structure consistent and inconsistent with the prescribed model. Scale bar: 100 nm.

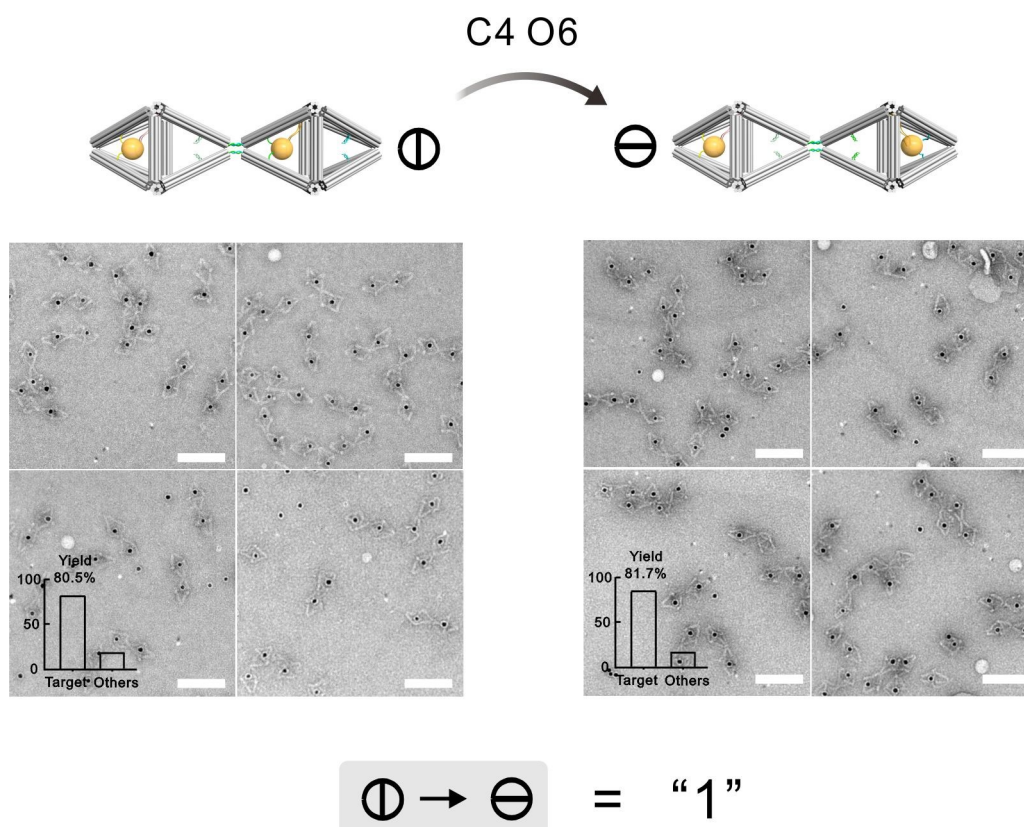

**Fig. S34.** Schematic and corresponding representative negative-stained TEM images of the DOCD undergoing the transition “ $\oplus \rightarrow \ominus$ ” activated by information strands “C4 O6” for exporting the Arabic numeral “1”. Insets show the population histograms for the prescribed target AuNPs-carrying Eoct-DOFs. “Target” and “Others” respectively represent the Eoct-DOF dimer structure consistent and inconsistent with the prescribed model. Scale bar: 100 nm.



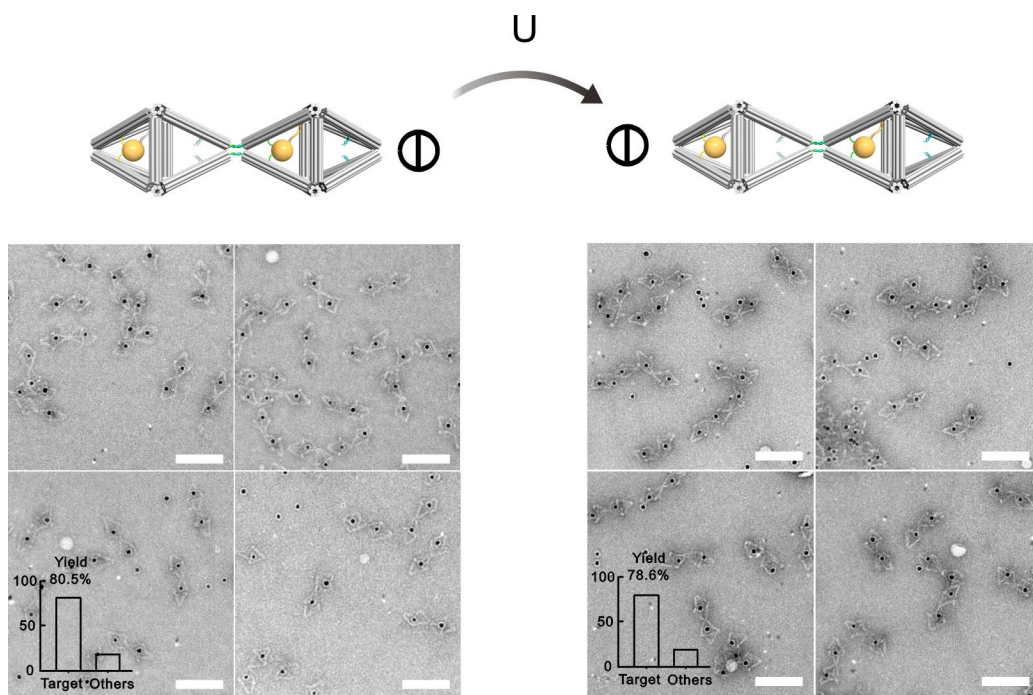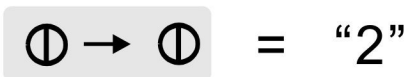

**Fig. S35.** Schematic and corresponding representative negative-stained TEM images of the DOCD undergoing the transition “ $\text{⊕} \rightarrow \text{⊕}$ ” activated by information strand “U” for exporting the Arabic numeral “2”. Insets show the population histograms for the prescribed target AuNPs-carrying Eoct-DOFs. “Target” and “Others” respectively represent the Eoct-DOF dimer structure consistent and inconsistent with the prescribed model. Scale bar: 100 nm.

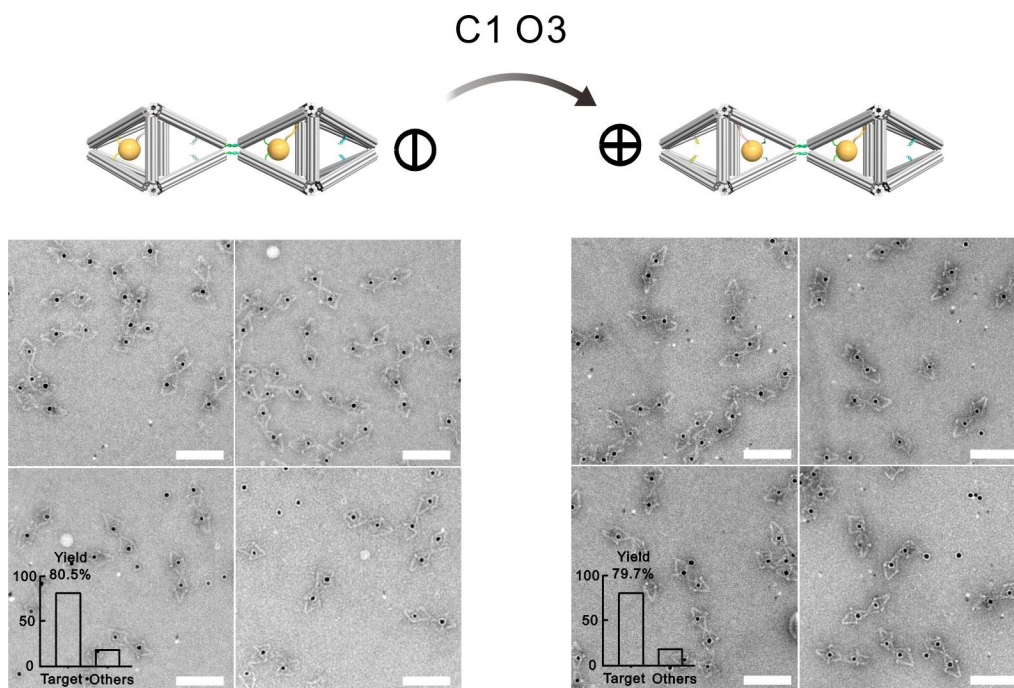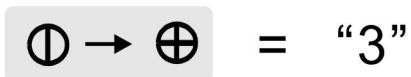

**Fig. S36.** Schematic and corresponding representative negative-stained TEM images of the DOCD undergoing the transition “ $\ominus \rightarrow \oplus$ ” activated by information strands “C1 O3” for exporting the Arabic numeral “3”. Insets show the population histograms for the prescribed target AuNPs-carrying Eoct-DOFs. “Target” and “Others” respectively represent the Eoct-DOF dimer structure consistent and inconsistent with the prescribed model. Scale bar: 100 nm.

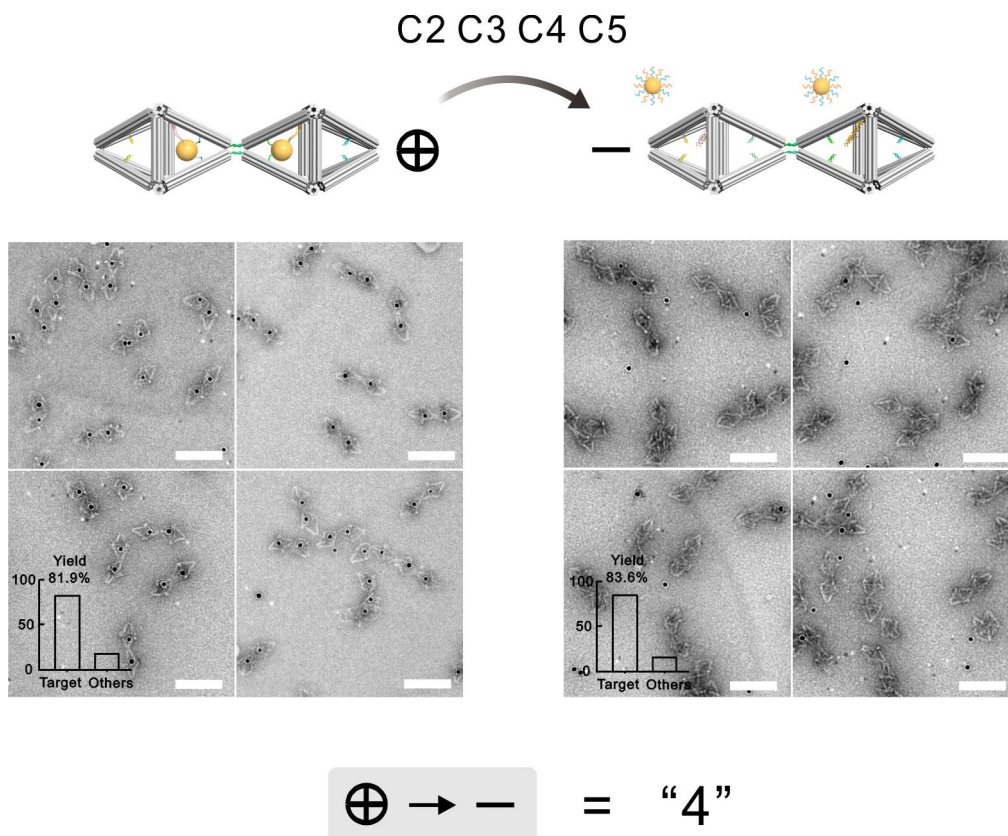

**Fig. S37.** Schematic and corresponding representative negative-stained TEM images of the DOCD undergoing the transition “ $\oplus \rightarrow \ominus$ ” activated by information strands “C2 C3 C4 C5” for exporting the Arabic numeral “4”. Insets show the population histograms for the prescribed target AuNPs-carrying Eoct-DOFs. “Target” and “Others” respectively represent the Eoct-DOF dimer structure consistent and inconsistent with the prescribed model. Scale bar: 100 nm.

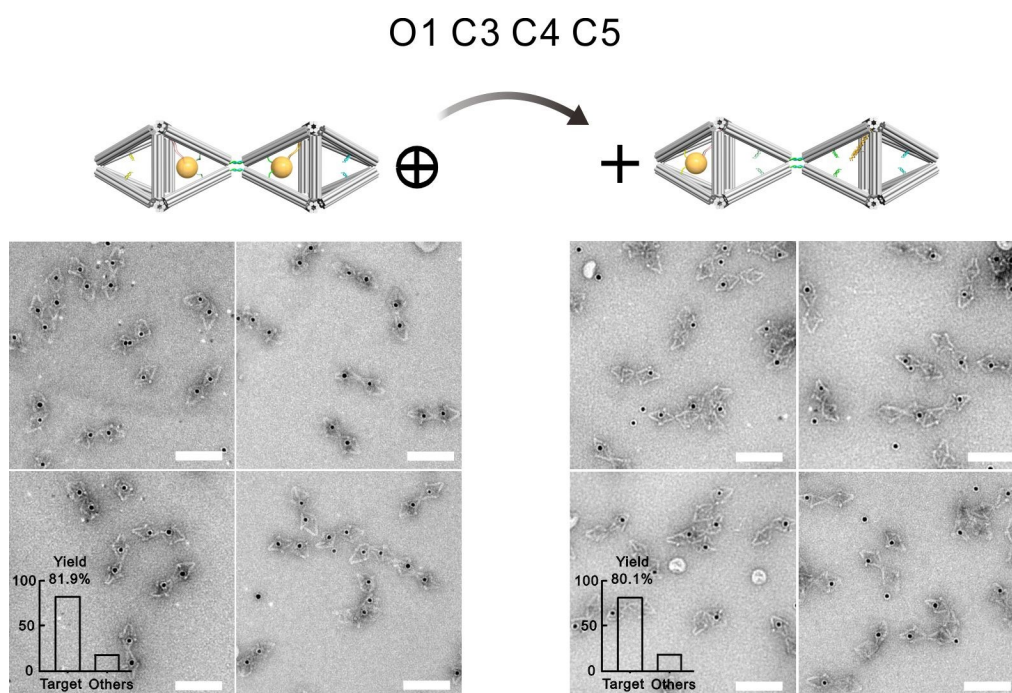

**Fig. S38.** Schematic and corresponding representative negative-stained TEM images of the DOCD undergoing the transition “ $\oplus \rightarrow +$ ” activated by information strands “O1 C3 C4 C5” for exporting the Arabic numeral “5”. Insets show the population histograms for the prescribed target AuNPs-carrying Eoct-DOFs. “Target” and “Others” respectively represent the Eoct-DOF dimer structure consistent and inconsistent with the prescribed model. Scale bar: 100 nm.

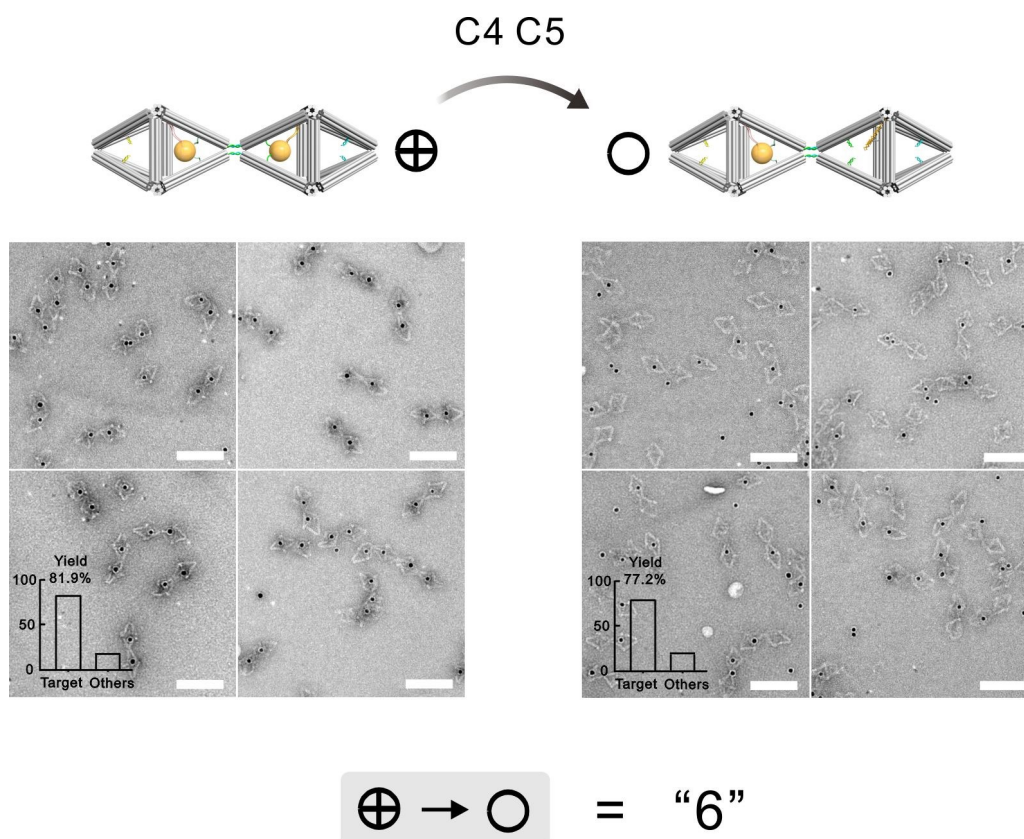

**Fig. S39.** Schematic and corresponding representative negative-stained TEM images of the DOCD undergoing the transition “ $\oplus \rightarrow \ominus$ ” activated by information strands “C4 C5” for exporting the Arabic numeral “6”. Insets show the population histograms for the prescribed target AuNPs-carrying Eoct-DOFs. “Target” and “Others” respectively represent the Eoct-DOF dimer structure consistent and inconsistent with the prescribed model. Scale bar: 100 nm.

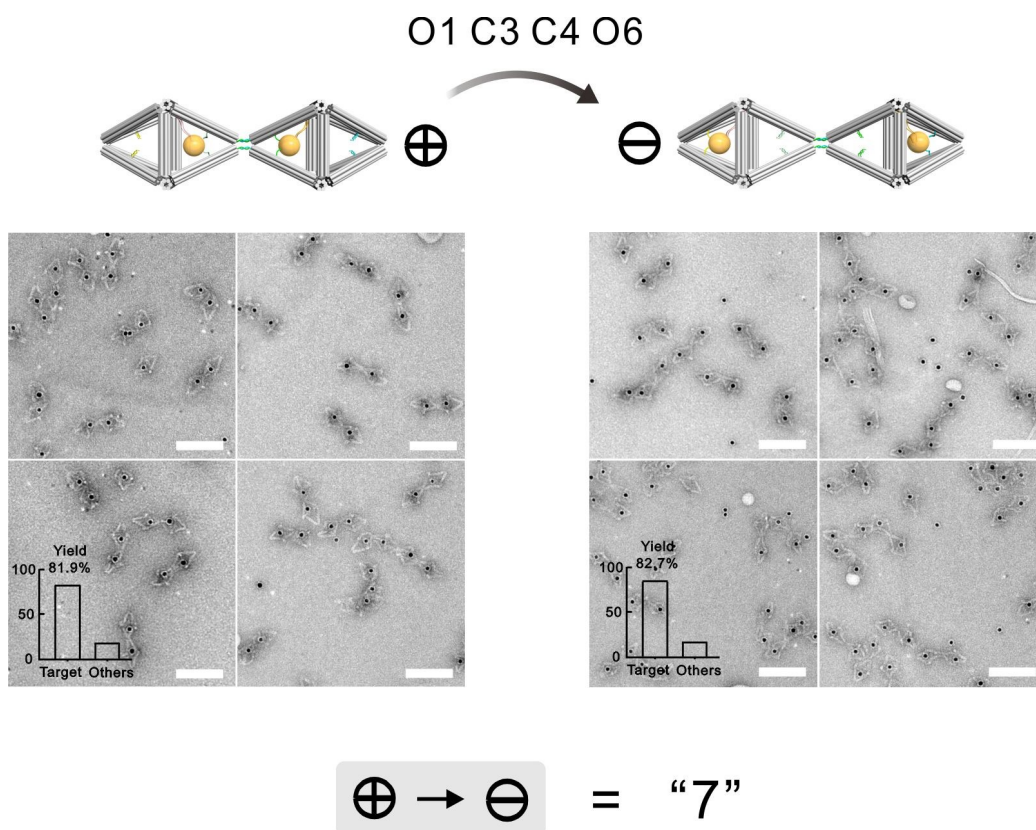

**Fig. S40.** Schematic and corresponding representative negative-stained TEM images of the DOCD undergoing the transition “ $\oplus \rightarrow \ominus$ ” activated by information strands “O1 C3 C4 O6” for exporting the Arabic numeral “7”. Insets show the population histograms for the prescribed target AuNPs-carrying Eoct-DOFs. “Target” and “Others” respectively represent the Eoct-DOF dimer structure consistent and inconsistent with the prescribed model. Scale bar: 100 nm.

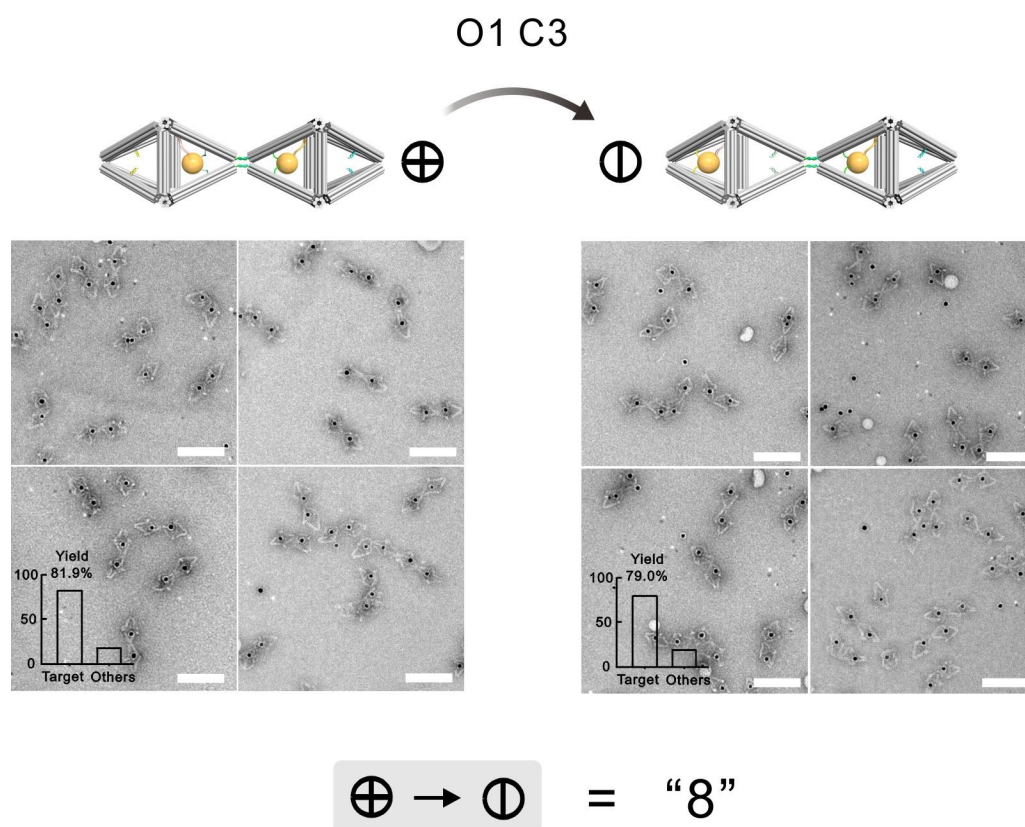

**Fig. S41.** Schematic and corresponding representative negative-stained TEM images of the DOCD undergoing the transition “ $\oplus \rightarrow \ominus$ ” activated by information strands “O1 C3” for exporting the Arabic numeral “8”. Insets show the population histograms for the prescribed target AuNPs-carrying Eoct-DOFs. “Target” and “Others” respectively represent the Eoct-DOF dimer structure consistent and inconsistent with the prescribed model. Scale bar: 100 nm.

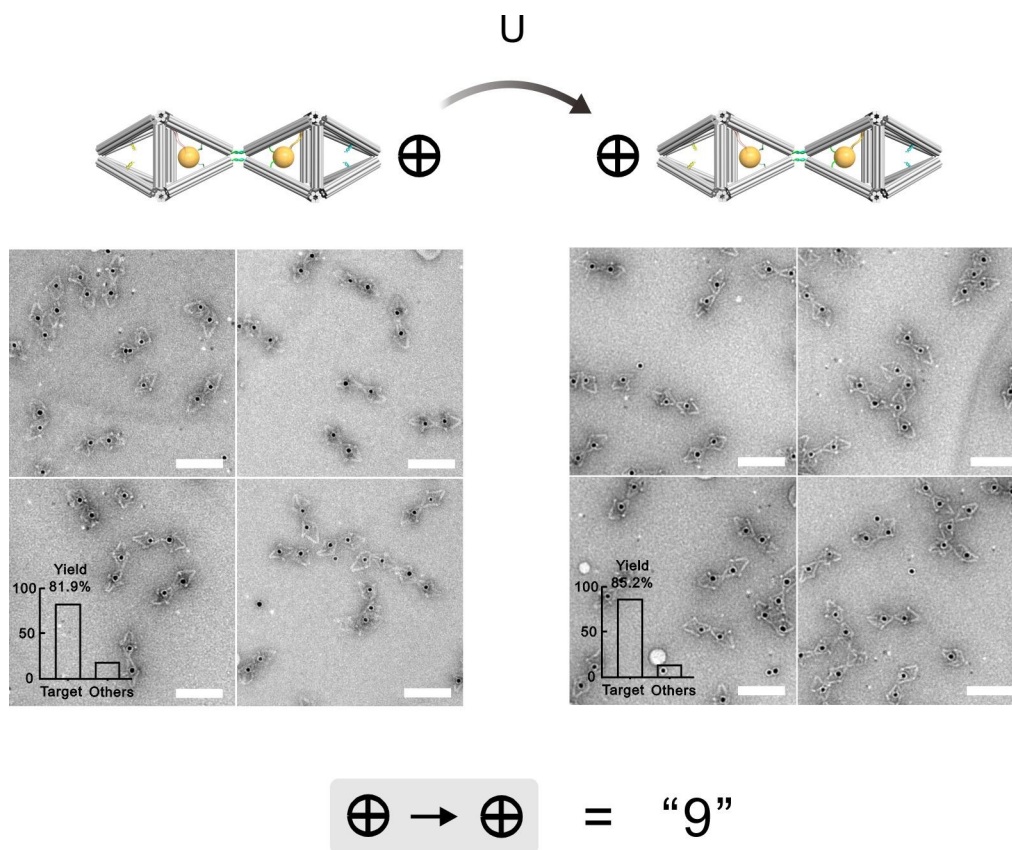

**Fig. S42.** Schematic and corresponding representative negative-stained TEM images of the DOCD undergoing the transition “ $\oplus \rightarrow \oplus$ ” activated by information strand “U” for exporting the Arabic numeral “9”. Insets show the population histograms for the prescribed target AuNPs-carrying Eoct-DOFs. “Target” and “Others” respectively represent the Eoct-DOF dimer structure consistent and inconsistent with the prescribed model. Scale bar: 100 nm.



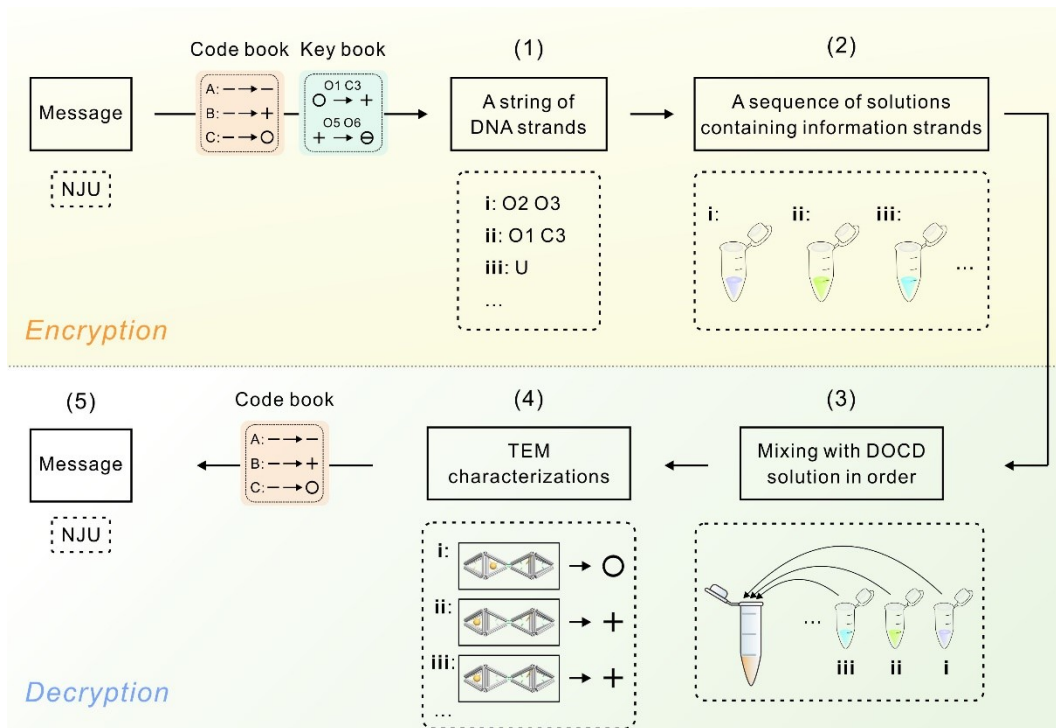

**Fig. S43.** A simple flow chart to explain the step-by-step cryptographic design pathway.

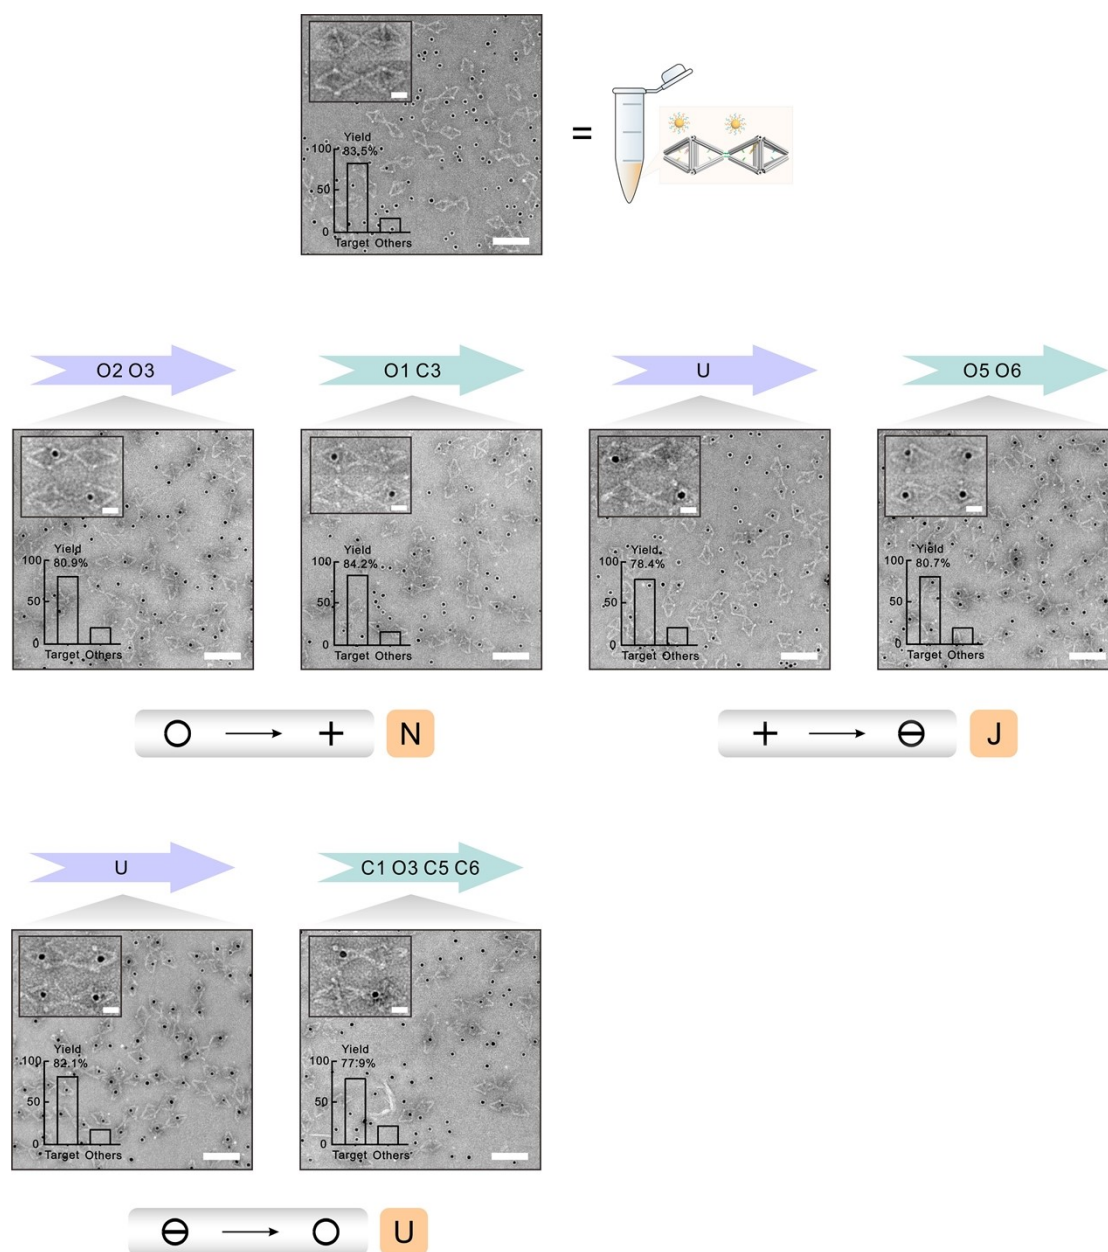

**Fig. S44.** The representative negative-stained TEM images of pattern transformation in the decryption process of example message “NJU”. Insets show the population histograms for the prescribed target AuNPs-carrying Eoct-DOFs. “Target” and “Others” respectively represent the Eoct-DOF dimer structure consistent and inconsistent with the prescribed model. Scale bar: 100 nm (inset: 20 nm).

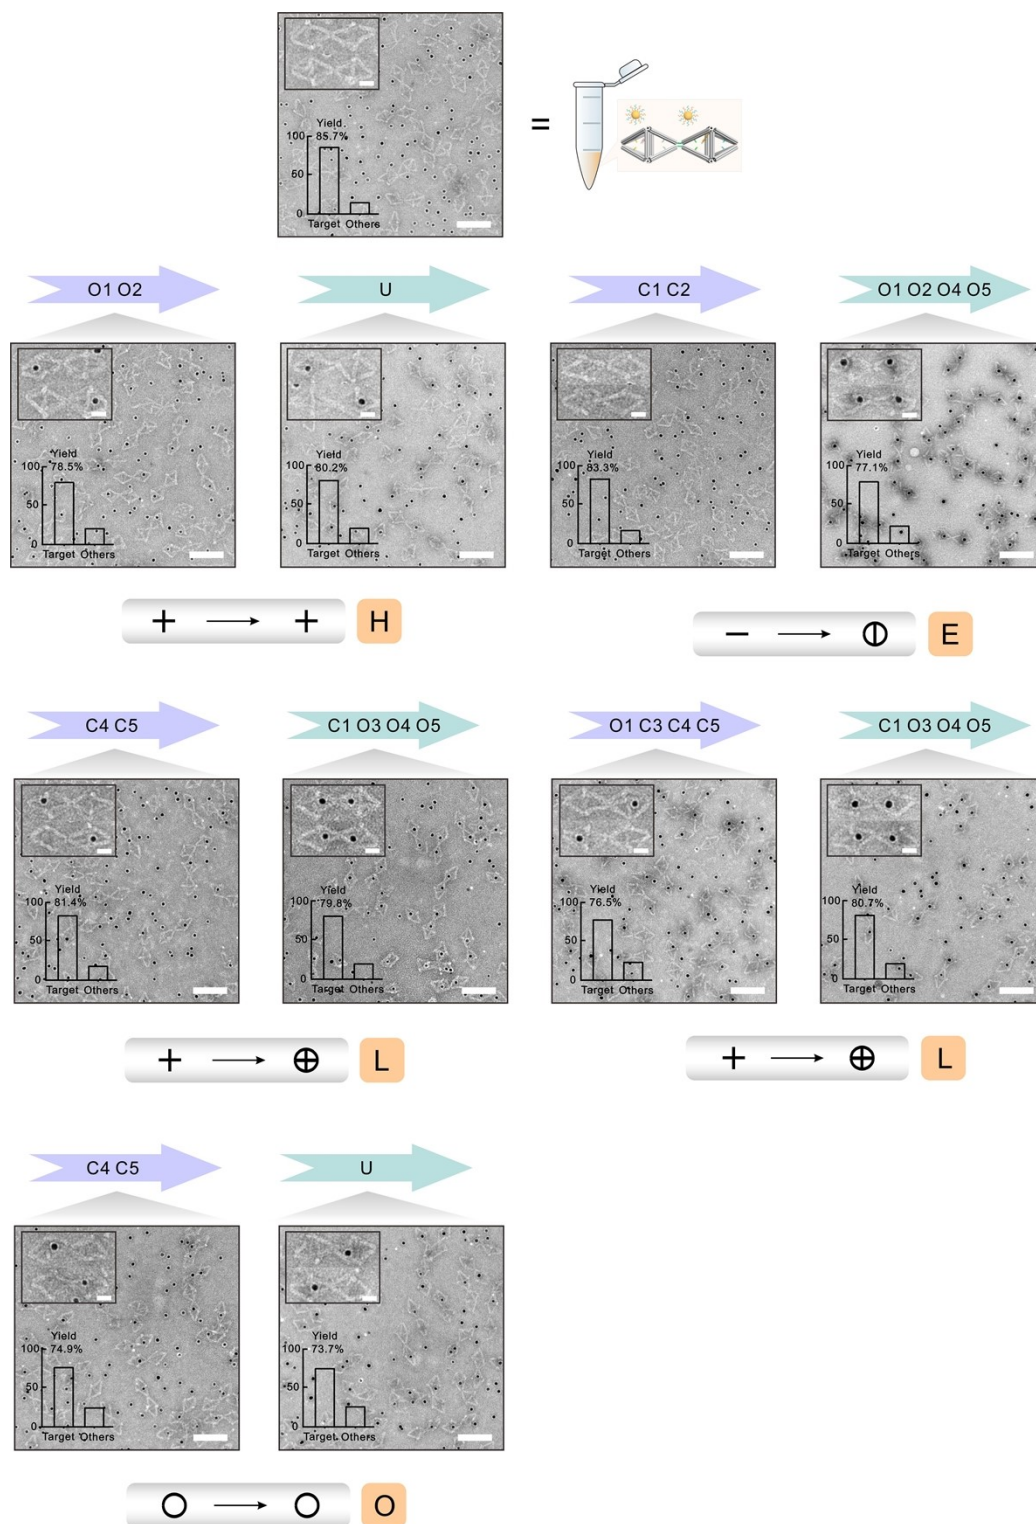

**Fig. S45.** The representative negative-stained TEM images of pattern transformation in the decryption process of example message “HELLO”. Insets show the population histograms for the prescribed target AuNPs-carrying Eoct-DOFs. “Target” and “Others” respectively represent the Eoct-DOF dimer structure consistent and inconsistent with the prescribed model. Scale bar: 100 nm (inset: 20 nm).

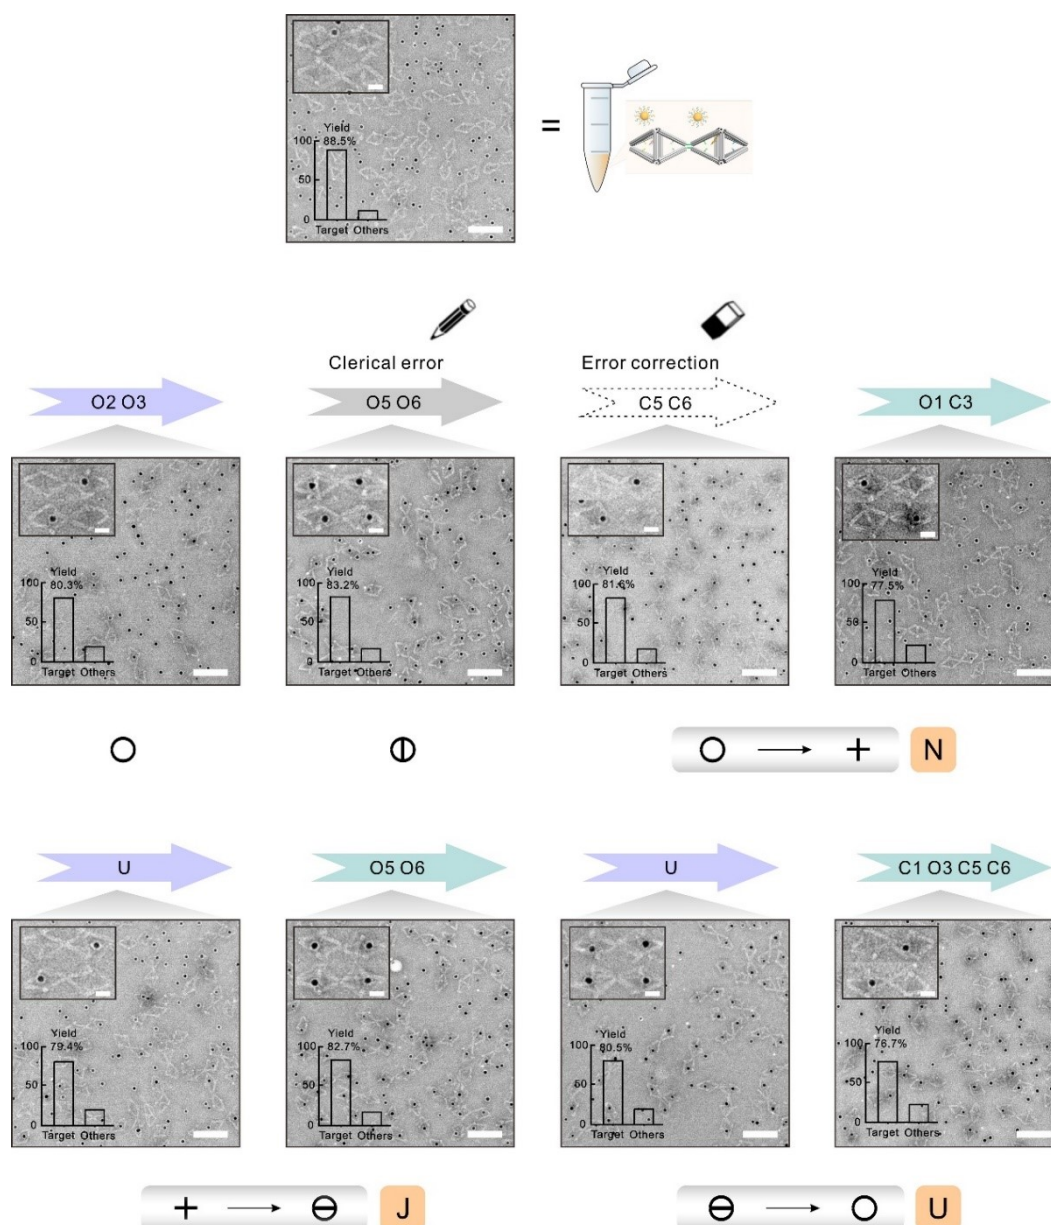

**Fig. S46.** The representative negative-stained TEM images showing error correction in the second step<sup>a</sup> during the decryption process of message “NJU”. Insets show the population histograms for the prescribed target AuNPs-carrying Eoct-DOFs. “Target” and “Others” respectively represent the Eoct-DOF dimer structure consistent and inconsistent with the prescribed model. Scale bar: 100 nm (inset: 20 nm).

<sup>a</sup> In case that the decoder mistook “O5 O6” for the right information strands “O1 C3” in the second step and suddenly realized it, he/she could deduce the wrong strands causing the mistake by observing the resulting TEM images and referring to the key book. The eraser strands were then determined to be “C5 C6”, which could be used to

turn the DOCD back to the previous cipher. Thereafter, the remaining five groups of information strands were successively decrypted by the DOCD from the breakpoint and eventually translated to be the message “NJU”.

**Table S1.** The efficiency statistics from one cipher symbol to another. The yields are obtained by counting the correct patterns from  $\sim 150$  Eoct-DOF dimers as statistic sample in the TEM images for each case.

| Character | Transition                        | Initial pattern | Yield | Final pattern | Yield |
|-----------|-----------------------------------|-----------------|-------|---------------|-------|
| A         | $- \rightarrow -$                 |                 | 86.7% |               | 88.5% |
| B         | $- \rightarrow +$                 |                 | 86.7% |               | 84.2% |
| C         | $- \rightarrow \circ$             |                 | 86.7% |               | 89.9% |
| D         | $- \rightarrow \ominus$           |                 | 86.7% |               | 83.2% |
| E         | $- \rightarrow \emptyset$         |                 | 86.7% |               | 80.4% |
| F         | $- \rightarrow \oplus$            |                 | 86.7% |               | 85.4% |
| G         | $+ \rightarrow -$                 |                 | 82.4% |               | 88.3% |
| H         | $+ \rightarrow +$                 |                 | 82.4% |               | 79.8% |
| I         | $+ \rightarrow \circ$             |                 | 82.4% |               | 82.7% |
| J         | $+ \rightarrow \ominus$           |                 | 82.4% |               | 84.4% |
| K         | $+ \rightarrow \emptyset$         |                 | 82.4% |               | 81.9% |
| L         | $+ \rightarrow \oplus$            |                 | 82.4% |               | 81.6% |
| M         | $\circ \rightarrow -$             |                 | 80.4% |               | 88.3% |
| N         | $\circ \rightarrow +$             |                 | 80.4% |               | 79.6% |
| O         | $\circ \rightarrow \circ$         |                 | 80.4% |               | 83.2% |
| P         | $\circ \rightarrow \ominus$       |                 | 80.4% |               | 84.4% |
| Q         | $\circ \rightarrow \emptyset$     |                 | 80.4% |               | 82.5% |
| R         | $\circ \rightarrow \oplus$        |                 | 80.4% |               | 83.7% |
| S         | $\ominus \rightarrow -$           |                 | 84.1% |               | 90.2% |
| T         | $\ominus \rightarrow +$           |                 | 84.1% |               | 81.0% |
| U         | $\ominus \rightarrow \circ$       |                 | 84.1% |               | 87.2% |
| V         | $\ominus \rightarrow \ominus$     |                 | 84.1% |               | 84.9% |
| W         | $\ominus \rightarrow \emptyset$   |                 | 84.1% |               | 88.2% |
| X         | $\ominus \rightarrow \oplus$      |                 | 84.1% |               | 80.5% |
| Y         | $\emptyset \rightarrow -$         |                 | 80.5% |               | 82.2% |
| Z         | $\emptyset \rightarrow +$         |                 | 80.5% |               | 78.8% |
| 0         | $\emptyset \rightarrow \circ$     |                 | 80.5% |               | 83.4% |
| 1         | $\emptyset \rightarrow \ominus$   |                 | 80.5% |               | 81.7% |
| 2         | $\emptyset \rightarrow \emptyset$ |                 | 80.5% |               | 78.6% |
| 3         | $\emptyset \rightarrow \oplus$    |                 | 80.5% |               | 79.7% |
| 4         | $\oplus \rightarrow -$            |                 | 81.9% |               | 83.6% |
| 5         | $\oplus \rightarrow +$            |                 | 81.9% |               | 80.1% |
| 6         | $\oplus \rightarrow \circ$        |                 | 81.9% |               | 77.2% |
| 7         | $\oplus \rightarrow \ominus$      |                 | 81.9% |               | 82.7% |
| 8         | $\oplus \rightarrow \emptyset$    |                 | 81.9% |               | 79.0% |
| 9         | $\oplus \rightarrow \oplus$       |                 | 81.9% |               | 85.2% |

**Table S2.** The volume change of the sample in each step during fluorescence measurements.

|                     | Initial sample <sup>a</sup> | Step 1                                                     | Step 2                                                     | Step 3                            | Step 4                                                     | Step 5                           | Step 6                                                                |
|---------------------|-----------------------------|------------------------------------------------------------|------------------------------------------------------------|-----------------------------------|------------------------------------------------------------|----------------------------------|-----------------------------------------------------------------------|
| Information strands |                             | O2 O3<br>(0.6 $\mu$ L<br>10 $\mu$ M<br>for each<br>strand) | O1 C3<br>(0.9 $\mu$ L<br>10 $\mu$ M<br>for each<br>strand) | U<br>(1.35 $\mu$ L<br>10 $\mu$ M) | O5 O6<br>(2.0 $\mu$ L<br>10 $\mu$ M<br>for each<br>strand) | U<br>(3.0 $\mu$ L<br>10 $\mu$ M) | C1 O3<br>C5 C6<br>(0.45 $\mu$ L<br>100 $\mu$ M<br>for each<br>strand) |
| Total volume        | 212.4<br>$\mu$ L            | 213.6<br>$\mu$ L                                           | 215.4<br>$\mu$ L                                           | 216.75<br>$\mu$ L                 | 220.75<br>$\mu$ L                                          | 223.75<br>$\mu$ L                | 225.55<br>$\mu$ L                                                     |

<sup>a</sup> The initial sample contained Eoct-DOF dimer (200  $\mu$ L 5 nM), AuNPs (10  $\mu$ L 200 nM) and closing strands 1-6 (0.4  $\mu$ L 10  $\mu$ M for each strand).

**Table S3.** Sequences of thiolated DNA strands modified on AuNPs.

| Sequence name | Thiolated DNA sequence (5'-3') |
|---------------|--------------------------------|
| HS-DNA 1      | GAAGTGATGGATGAT-SH             |
| HS-DNA 2      | TAGGTGAGAAGTGAT-SH             |

**Table S4.** Sequences of anchor strands (Capture 66/86, Capture 138/125, Capture 97/98 for Eoct-DOF A; Capture 66'/86', Capture 138'/125', Capture 97'/98' for Eoct-DOF B).

|          | Sequence name | Staple sequence (5'-3')                                                                                |
|----------|---------------|--------------------------------------------------------------------------------------------------------|
| Anchor 1 | Capture 66    | ATCCATCACTTCACTACACTATTTTCGAGGAAAA<br>CGTCAAAAATGAAAATAGCTACAGAGCTAAAGA                                |
|          | Capture 86    | ATCCATCACTTCACTACACTATTTTCAGTTCAGA<br>GAAGGATTAGTTTCGTCCTCAACTAATAACGC                                 |
| Anchor 2 | Capture 138   | ATCCATCACTTCACTACTCTACGTTGTTGTTGTT<br>GTTGTTAGCCTAAAGCAAGCAAGAACGCGAG<br>GCGTGAAGCCGCTACAATTTTATCCTGAA |
|          | Capture       | ATCCATCACTTCACTACTCTACGTTGTTGTTGTT<br>GTTGTTTCGTAAATAAAAATAGATTCAAAGG                                  |

|          |              |                                                                                                       |
|----------|--------------|-------------------------------------------------------------------------------------------------------|
|          | 125          | GTATATGATGAGATCTACAAAGGCTATC                                                                          |
| Anchor-3 | Capture 97   | ACTTCTCACCTATCATCTTACTTTGCTGAGATA<br>TGGTTGCTTTAGTAGAAGAGGCGAATAATTACC                                |
|          | Capture 98   | ACTTCTCACCTATCATCTTACTTTAGTTTGAAA<br>GCAAATATTTAAATTGTAAAGCCAGCAAATCTA                                |
| Anchor 4 | Capture 66'  | ATCCATCACTTCTACATCTCATTTCGAGGAAA<br>ACGTCAAAAATGAAAATAGCTACAGAGCTAAAG<br>A                            |
|          | Capture 86'  | ATCCATCACTTCTACATCTCATTTCAGTTCAGA<br>GAAGGATTAGTTTCGTCACTCAACTAATAACGC                                |
| Anchor 5 | Capture 138' | ATCCATCACTTCCACTTTCTCGTTGTTGTTGTT<br>GTTGTTAGCCTAAAGCAAGCAAGAACGCGAG<br>GCGTGAAGCCGCTACAATTTTATCCTGAA |
|          | Capture 125' | ATCCATCACTTCCACTTTCTCGTTGTTGTTGTT<br>GTTGTTTCGTAAATAAAAATAGATTCAAAGG<br>GTATATGATGAGATCTACAAAGGCTATC  |
| Anchor 6 | Capture 97'  | ACTTCTCACCTACACTAATCATTGCTGAGATA<br>TGGTTGCTTTAGTAGAAGAGGCGAATAATTACC                                 |
|          | Capture 98'  | ACTTCTCACCTACACTAATCATTAGTTTGAAA<br>GCAAATATTTAAATTGTAAAGCCAGCAAATCTA                                 |

**Table S5.** Sequences of sticky end strands and closing end strands (sequence 1-4 for Eoct-DOF A; sequence 1'-4' for Eoct-DOF B).

| Sequence name | Staple sequence (5'-3')                                       |
|---------------|---------------------------------------------------------------|
| Sticky end 1  | CAATAGATAATATAAATCCTTTGCCCGG<br>CGGTCTCAATCAATTAACCTAACCTTCAT |
| Sticky end 2  | TTAATGCGCGAAAGATAAAACAGAGCC<br>AGCCAACCAGTAATTAACCTAACCTTCAT  |
| Sticky end 3  | TAACCGTTGTAGTCCAGAACAATATTTG<br>CCTGAACAAAATTTAACCTAACCTTCAT  |
| Sticky end 4  | GAAATTGCGTAGGGAGAAACAATAACGT<br>TATTAGCAATTCATTAACCTAACCTTCAT |
| Sticky end 1' | AAAGTACAACGGGTTACTTAGCCGGACT<br>CAGCAATACGTAATATGAAGGTTAGGTTA |
| Sticky end 2' | ATAGTTGCGCCGTTTTGCGGGATCGTGTT<br>AGCGAGGAATTGCATGAAGGTTAGGTTA |
| Sticky end 3' | GTGAATTACCTTAACGGAACAACATTGGC<br>GCAGGATATTCATATGAAGGTTAGGTTA |
| Sticky end 4' | TTTTCAGGGATACCACAGACAGCCCTCAG<br>GTAGATCATAACCATGAAGGTTAGGTTA |



|                |                                                                 |
|----------------|-----------------------------------------------------------------|
| Closing end 1  | AAAGTACAACGGGTTACTTAGCCGGACTC<br>AGCAATACGTAATTTTTTTTTTTTTTTTT  |
| Closing end 2  | ATAGTTGCGCCGTTTTGCGGGATCGTGTTA<br>GCGAGGAATTGCTTTTTTTTTTTTTTTTT |
| Closing end 3  | GTGAATTACCTTAACGGAACAACATTGGC<br>GCAGGATATTCATTTTTTTTTTTTTTTTT  |
| Closing end 4  | TTTTCAGGGATACCACAGACAGCCCTCAGG<br>TAGATCATAACCTTTTTTTTTTTTTTTTT |
| Closing end 1' | CAATAGATAATATAAATCCTTTGCCCGGCG<br>GTCTCAATCAATTTTTTTTTTTTTTTTT  |
| Closing end 2' | TTAATGCGCGAAAGATAAACAGAGCCA<br>GCCAACCAGTAATTTTTTTTTTTTTTTTT    |
| Closing end 3' | TAACCGTTGTAGTCCAGAACAATATTTTCGC<br>CTGAACAAAATTTTTTTTTTTTTTTTT  |
| Closing end 4' | GAAATTGCGTAGGGAGAAACAATAACGTT<br>ATTAGCAATTCATTTTTTTTTTTTTTTTT  |

**Table S6.** Sequences of information strands.

| Sequence name    | Staple sequence (5'-3')   |
|------------------|---------------------------|
| Closing strand 1 | ACACATCTTAGTGTAGTGAAGTGA  |
| Closing strand 2 | TTACATCAGTAGAGTATGAAGTGA  |
| Closing strand 3 | ACTCACTTGTAAGATGATAGGTGA  |
| Closing strand 4 | TCACCTTCTACATCTCAGTAGTTGA |
| Closing strand 5 | TTCTACTTGAGAAAGTGGAAGTGA  |
| Closing strand 6 | TCTCACTTTGATTAGTGTAGGTGA  |
| Opening strand 1 | TCACCTCACTACACTAAGATGTGT  |
| Opening strand 2 | TCACCTCATACTCTACTGATGTAA  |
| Opening strand 3 | TCACCTATCATCTTACAAGTGAGT  |
| Opening strand 4 | TCACCTTCTACATCTCAGTAGTTGA |
| Opening strand 5 | TCACCTCCACTTTCTCAAGTAGAA  |
| Opening strand 6 | TCACCTACACTAATCAAAGTGAGA  |
| Poly T           | TTTTTTTTTTTTTTTT          |

**Table S7.** Sequences of fluorophore-modified capture strands.

| Sequence name  | Staple sequence (5'-3')                    |
|----------------|--------------------------------------------|
| Capture-66-FAM | FAM-<br>ATCCATCACTTCACTACACTATTTTCGAGGAAAA |

|                 |                                                                                    |
|-----------------|------------------------------------------------------------------------------------|
|                 | CGTCAAAAATGAAAATAGCTACAGAGCTAAAGA                                                  |
| Capture-98-Cy3  | Cy3-<br>ACTTCTCACCTATCATCTTACTTTAGTTTGAAA<br>GCAAATATTTAAATTGTAAAGCCAGCAAATCTA     |
| Capture-66'-ROX | ROX-<br>ATCCATCACTTCTACATCTCATTTCGAGGAAA<br>ACGTCAAAAATGAAAATAGCTACAGAGCTAAAG<br>A |
| Capture-98'-Cy5 | Cy5-<br>ACTTCTCACCTACACTAATCATTTAGTTTGAAA<br>GCAAATATTTAAATTGTAAAGCCAGCAAATCTA     |

**Table S8.** Sequences of staple strands of Eoct-DOF.

| Sequence name | Staple sequence (5'-3')        |
|---------------|--------------------------------|
| Eoct 1        | CTCGTTTACCAGACGACAACACTAAAGATT |
| Eoct 2        | AAAAGGGACATTCTGGTCACACGTTGCAAC |
| Eoct 3        | GCCACTACGAAGGCACGGGTAAAGCGAAAG |
| Eoct 4        | TTGGGGCGCGAGCTGATTAGCTATTCCATA |
| Eoct 5        | TTCAAATATATTTTAGAACGCGACCTCCGG |
| Eoct 6        | CAATATAATCCTGATTGATGATGATTTTAA |
| Eoct 7        | CAGACTGTAGCGCGTTAGTTTGCCCAGTAG |
| Eoct 8        | GTCCACTATTAAGAACCAGTTTTGGTTCC  |
| Eoct 9        | GAATAATAATTTTTTCCAATAATAACGAT  |
| Eoct 10       | GGCCGATTAAAGGGATCGGGAGCCCGCCGC |
| Eoct 11       | GCCTCTTCGCTATTACAGGGCGAGCACCGC |
| Eoct 12       | AAGCCAGAATGGAAAGAAATAAACAGAGCC |
| Eoct 13       | CCAGACGACGACAATAGGTAAAGCTCAACA |
| Eoct 14       | TACCCAAATCAACGTAAGAACCGACGGTCA |
| Eoct 15       | TTGCGCTCACTGCCCGACTCACACATGGTC |
| Eoct 16       | AATTACATTTAACAATTCAAGAAATTGCTT |
| Eoct 17       | GCCATCAAAAATAATTTTAACTAATCAG   |
| Eoct 18       | AGTCAAATCACCATCAGAGAAAGTTTCAAC |
| Eoct 10       | AACAAAGTCAGAGGGTTTAACTGTTATCCC |

|         |                                                 |
|---------|-------------------------------------------------|
| Eoct 20 | TTATTTTGT CACAATCACACCACACGCAGT                 |
| Eoct 21 | ATCTGGTCAGTTGGCACAACCCAGTATTA                   |
| Eoct 22 | TAAGTATAGCCCGGAAGTCGAGAAAACATG                  |
| Eoct 23 | AGCGAACCAGACCGGATTAATTCGTCAGAA                  |
| Eoct 24 | GACTTGCGGGAGGTTTTTTTAGCTTACCGC                  |
| Eoct 25 | ACAGCATGCTCCATAGATTTGTATCATCCC<br>CAGCGAAACGAA  |
| Eoct 26 | GAAATCGGCCCCCTACGGGGTCAGTGCCCT<br>TTTGATCCAACG  |
| Eoct 27 | AACGGGTCCTGAACAAGAAAAATAATATCT<br>TATCATTCCAAG  |
| Eoct 28 | AAAAGCCCTCAGGACGTTGGTGTAGATGGG<br>GAACAGGCCTTC  |
| Eoct 29 | ATTAAATCAGCTTTCATCAACATTAATTTG<br>TTAAAATTCGC   |
| Eoct 30 | TACATTTAATAGTACATCCAATAAATCAAA<br>GCTAACCAAAAA  |
| Eoct 31 | GCCCAATTTTGCCATAACGAGCGTCTTTGCA<br>CCCATTAAATC  |
| Eoct 32 | ATAGCGAAATTACGTAGGAATACCACATCA<br>GTACAGTACCGT  |
| Eoct 33 | GTTGGGATGAAAGAGGACAGATGAACGGAG<br>TAGATCATTAGA  |
| Eoct 34 | CTTTTCAAAGAATACTCATCTTTGACCGCCT<br>GATGAAATCC   |
| Eoct 35 | AAGCCTGCGTGCCAGCTGCATTAATGAAAAG<br>CATAAAGTGTA  |
| Eoct 36 | TCAGTGATCATCAAGA ACTGACCAACTTAGAA<br>AAATCTACGT |
| Eoct 37 | TAACAGTACCCTGTAGCCTCAGAGCATATACA<br>GGCGCATCAA  |
| Eoct 38 | CTAATGCGAATATAAGAATCGCCATATTTACC<br>GCACTCATCG  |
| Eoct 39 | ATAGCTGTTGCCCCCGGGCAACAGCTGAATTG<br>GGCGTCGGGA  |
| Eoct 40 | GCCGCCATGTAGCGGGAAGGGAAGAAAGAGA<br>GCTTTCTGAAT  |
| Eoct 41 | GGAATTAATGGA ACTACCATATCAAAACGTC<br>AGAGTAACAG  |
| Eoct 42 | TCTGAATTCATCATTTATCATTTTTCGGTAATA<br>CATGAATGG  |

|         |                                                 |
|---------|-------------------------------------------------|
| Eoct 43 | AGAGGCAATGAGGAAGGGTAGCAACGGCAGG<br>TGTCAAATTCC  |
| Eoct 44 | CGTTCTATAGGTAATTTTAGAACCCCTCAAGGA<br>TGAACGGTAA |
| Eoct 45 | TTCTACTCGCAAATCAATTCTGCGAACGTGTT<br>GTAATCGGTA  |
| Eoct 46 | AGGAAAACCAGCAGACTGATAGCCCTAAACA<br>ATATAGATAGA  |
| Eoct 47 | GAGCCGTCGTAAGAAAGCGGCCAACGCTGA<br>TCGTGCTCAAG   |
| Eoct 48 | AAACAGGAGATAACCCACAAGAATTGAGAGA<br>GAATAACATAA  |
| Eoct 49 | GTGCATCACAACCCGTCGGATTCTCCGTGGCG<br>CATCGTAACC  |
| Eoct 50 | CTAAAGTAGGCCGCACAATGACAACAACCTGA<br>ATTTAAATCTC |
| Eoct 51 | AATCCAACAAAAGAAAGTAAGCAGATAGAA<br>TAGCACGCTAAT  |
| Eoct 52 | TAACGTGAGAATCCGTGAGTGAATAACCACA<br>TAGCGATAGCT  |
| Eoct 53 | GGATTATTGACCTGAATACGTGGCACAGAAC<br>ATCGTACCGAA  |
| Eoct 54 | GTACGCCCTTTCCTTACAGGGCGCGTACAGAG<br>TCAATAGTGA  |
| Eoct 55 | ATCATTTCGAAAGGAGCGGGAATAGCCCGCG<br>AAAAAGCGTCA  |
| Eoct 56 | TTAATTGATATAATGCTGTGGAAGCCCGATTA<br>GAGAAGGCGA  |
| Eoct 57 | ATCATAAACGAACCTATGCGATTTTAAGAATGG<br>TTTTGCTCAT |
| Eoct 58 | AAGCATCGAGGAAGATATCTTTAGGAGCGAAG<br>TATAACAAT   |
| Eoct 59 | AAAGTATTCAAAAAGTCATAAATATTCAAAT<br>GTTATCACCG   |
| Eoct 60 | GCAAGGAAGTACAGAGAGTCTGGAGCATTTT<br>TGAATTCAAC   |
| Eoct 61 | ATCAGAGGAAGCGCACGATTTTTTTGTTTACGCA<br>ATAATAACG |
| Eoct 62 | CACCATTACCACCCGCCTCCCTCAGAGCTAATC<br>AAGCATTTT  |
| Eoct 63 | TTTGCTAAAAGCGTTTATTTTGTATCGGATACC<br>ATATGAAAT  |
| Eoct 64 | TAATGTGGCTGATAAATTATGCTATTTTCCGCA<br>ATGCCTGAG  |

|         |                                                |
|---------|------------------------------------------------|
| Eoct 65 | TAGATTAATATATTGAGAAGTGTTTTTTGGA<br>CGAGCACGTA  |
| Eoct 66 | CGAGGAAAACGTCAAAAATGAAAATAGCTAC<br>AGAGCTAAAGA |
| Eoct 67 | ATGTTAGTTATACACCGGAATCATAATTGACC<br>GTGAATTCAT |
| Eoct 68 | CAAAAGGGAGGCTTGCCACCCTCAGAACAAC<br>CCATAACTACA |
| Eoct 69 | AAGATTAGTATTCTAAATCAGATATAGATATA<br>TTTTAAATAG |
| Eoct 70 | AACCGATTTTATCAGCTTGCTTTCGAGGCATCG<br>CCCACGCAT |
| Eoct 71 | CAAAAAACGGAGTGTCTTCCAGACGTTCTGA<br>GGCTTGCAGG  |
| Eoct 72 | TCGGTCGAGTAAATGAATTTTCTGTATGGTCA<br>CCACGATAGC |
| Eoct 73 | CAGACCAAATTAAGTAGCCACCAGAACGGT<br>TGACTTAGTAC  |
| Eoct 74 | CAGAGGCAAAGAACGGGTTTAGATAAGTATA<br>CCAGAAACCTA |
| Eoct 75 | GTTTCAGAAGGCTCCAAAAGGAGCCTTTAACA<br>ACTTTCAACA |
| Eoct 76 | AACCTGTGGGTGCCTGTGAAATTGTTATCAGC<br>AAGCGGTCCA |
| Eoct 77 | CAGAAGGAATAAGAGCAAGAAACAATGACCG<br>AACAAAGTTAC |
| Eoct 78 | TTTACAGTTAAAACACACTAAGCCCAATAAGA<br>GGAGCTTTAC |
| Eoct 79 | GTAGGGCGCAAGCCATCGGCTGTCTTTCCCA<br>TCCTGTTTAC  |
| Eoct 80 | AAGTTTGTACATCGATTTTCAGGTTTAATTATT<br>TGTTATACT |
| Eoct 81 | ACTTGCCATAATCAACAGTACATAAATCAGAT<br>TTCTATTCAC |
| Eoct 82 | TAATATTGTCTAAAGTTATGAGCGAGTATGAT<br>GAAAGCAACC |
| Eoct 83 | ATGGTTTACATATAAGAAAATACATACAAACT<br>GTTTAGTATC |
| Eoct 84 | CGGTCATTAATCAGGCAAGGCCGGAACGGA<br>ACCGCTCAGAT  |
| Eoct 85 | ACCCTTCTTACATTTGGAAATACCTACAATAAA<br>AACCATTAC |
| Eoct 86 | CAGTTCAGAGAAGGATTAGTTTCGTCCTCA<br>ACTAATAACGC  |

|          |                                                 |
|----------|-------------------------------------------------|
| Eoct 87  | GGTCAGGAAAGACTATCAAAAAGATTAACAC<br>CTGCAGGTCGA  |
| Eoct 88  | TGAGCAAATGGAAGTGAGGCCACCGAGTTA<br>GTA ACTATCGG  |
| Eoct 89  | AGAGTTGCCGCTCACAATTCCACACA ACTTTT<br>GACCTGAAAT |
| Eoct 90  | AGCACCGAGCCCCCTTGCCATCTTTTCACGCC<br>ACCCACCCCT  |
| Eoct 91  | CTTTTTTAAGAAGACAAAATCGCGCAGAACTC<br>AAATAACATC  |
| Eoct 92  | AGGAATTACCTTG CAGTGCCACGCTGAGACTT<br>TACTAGACGT |
| Eoct 93  | CCAGTCAGAGTAGTAAATTGGGCTTGAGACTG<br>GCTCATTATA  |
| Eoct 94  | GCAAAGCGGATCCCACGACGGCCAGTGCGGGT<br>AACTCCAACA  |
| Eoct 95  | AACACTGCAGAACCTTGCAAAGAAGTTTAGA<br>TACATGCAA    |
| Eoct 96  | CCACCCTAGGATTAGCGGGGTTTTGCTCGAGGT<br>TTAGGGGGT  |
| Eoct 97  | GCTGAGATATGGTTGCTTTAGTAGAAGAGGCG<br>AATAATTACC  |
| Eoct 98  | AGTTTGAAAGCAAATATTTAAATTGTAAAGCC<br>AGCAAATCTA  |
| Eoct 99  | GCTTAATAAAATCATAGAATCCTTGAAATTGC<br>TTCAGGAACG  |
| Eoct 100 | TCAAAGGGAGATAGCCCTTATAAATCAAAGG<br>CCCGTATAAAC  |
| Eoct 101 | TTCTGGTATGCAACAGCTTAATTGCTGACTCC<br>TTTGGCGAAA  |
| Eoct 102 | AATAAGAAGAACGCGCCTGTTTATCAACATTT<br>TCGAGCCAGT  |
| Eoct 103 | CTTAGGTGAGCCATGACGGAAATTATTCGCGA<br>CATCATCTTC  |
| Eoct 104 | AAATACCACTAGAAAAAGCTGCTGATGCAATT<br>TAACCAAAGA  |
| Eoct 105 | TGAATACGGTAATACAATACTTCTTTGATAAAA<br>GAGAATTAC  |
| Eoct 106 | TGACCTAAAATCCATATAACTATATGTATATTA<br>TCACCGTCA  |
| Eoct 107 | CTGTAGCTTTTGTTCAGGAAGATTGTATGGGGA<br>CGACGACAG  |
| Eoct 108 | GGGGGATCAGGCTGACCAGGCAAAGCGCGAAG<br>CTCAACATGT  |

|          |                                                               |
|----------|---------------------------------------------------------------|
| Eoct 109 | ACACCGCCTCGTATCATTGAGGATTTAACTAA<br>CAAGTTGAA                 |
| Eoct 110 | CTGGCCCGCGGGGAGAGGCGGTTTGCCTTTGCC<br>CTTCACCGC                |
| Eoct 111 | TACTCAGAGTACCACTGAGACTCCTCAAGAAAA<br>CGAGAATGA                |
| Eoct 112 | AATAGTATTGAATCCCCCTCAAATGCTTTTGCCA<br>GAGTACCG                |
| Eoct 113 | CAAAAGGATTAAAGGTGAAAAGGTGGCAACCA<br>GCGTGGTTTG                |
| Eoct 114 | TTACCGTTTGGCCTCAGGAGGTTGAGGCAAGC<br>GCTAGGGCGC                |
| Eoct 115 | TACATGGTTGAGTAACAGTGTCAGACGATCCA<br>GTAACCGTCT                |
| Eoct 116 | TTAAGTTCAAGCTTGCATGTTCCGCTTGTGCT<br>GCAGTACCT                 |
| Eoct 117 | TTATCCGGTATGCCGGAGAGGGTAGCTAAACA<br>AGAGAATCGC                |
| Eoct 118 | CTGACCTATAAGGCTTGCCCTGACGAGAGGCG<br>CATAGGCTGG                |
| Eoct 119 | AACCAAGTAACAACGCCAACATGTAATTAACA<br>AAGAAGGAGC                |
| Eoct 120 | CATCAGTTAGCATTGCAAGCCCAATAGGCGCC<br>ACCAACCAA                 |
| Eoct 121 | AGTTAATGCAAAATGGTTGAGTGTTGTTTCGTG<br>GACTGATACAGGAGTGTACTGG   |
| Eoct 122 | GAATACCATAAGAAATTAGACGGGAGAAAAT<br>TGAGATAGCTATCTTACCGAAGC    |
| Eoct 123 | GCGACCTCGGAACGAGTTTCCATTAAACCAAC<br>CTAATTATACCAAGCGCGAAAC    |
| Eoct 124 | TATCGGCCCAAAAAAAAAATCAGCTCATTTTCGCG<br>TCTAACGGCGGATTGACCGTAA |
| Eoct 125 | TCGTAAATAAAAATAGATTCAAAGGGTATAT<br>GATGAGATCTACAAAGGCTATC     |
| Eoct 126 | CATTATGTGATTCCGGTCAATAACCTGTAAAG<br>GTGAAGGCAAAGAATTAGCAA     |
| Eoct 127 | AGAACAATTAATTGAAGTACCGACAAAAAAC<br>AACATAATTTACGAGCATGTAGA    |
| Eoct 128 | ATATGCGCAAACGTAAAGAAACGCAAAGAA<br>TAGAATGATAAATAAGGCGTTAAA    |
| Eoct 129 | CCGACTTTGGGTTAATCGCAAGACAAAGTTA<br>ATTTCAACCGATTGAGGGAGGG     |
| Eoct 130 | ACGCCTGTGAGATTAGGCATAGTAAGAGCGA<br>TAAACTCAGAGCCACCACCCTCA    |

|          |                                                             |
|----------|-------------------------------------------------------------|
| Eoct 131 | CGCTGGTTTTCTGTGAATGAGTGAGCTACTTT<br>CCAGCCAGGGTGGTTTTTCTTT  |
| Eoct 132 | CGAACCAACGCTCAGGCAGATTCACCAGCCA<br>ACAGTTTTGAATGGCTATTAGTC  |
| Eoct 133 | TAATAAAGGGAACCGAGTAATCTTGACAACA<br>AAGCAATTTCAACTTTAATCATT  |
| Eoct 134 | CCTTGCTCAAGTTATGATGAAACAAACATTCA<br>TTTGTCTGTCCATCACGCAAAT  |
| Eoct 135 | GAGTTAATTTGTGCGAGAATAGAAAGGAAACG<br>TTGACTTAAACAGCTTGATACCG |
| Eoct 136 | TGGCAAGGCATTGATGATATTCACAAACCGCA<br>GTCGACGGGGAAAGCCGGCGAA  |
| Eoct 137 | TCGACAACCTGCAACTGAACCTCAAATATAATC<br>AACACTAATAGATTAGAGCCGT |
| Eoct 138 | AGCCTAAAGCAAGCAAGAACGCGAGGCGTGA<br>AGCCGCTACAATTTTATCCTGAA  |
| Eoct 139 | CAGAGCCACCATTATAGCGACAGAATCATTCA<br>TCGAATCACCGGAACCAGAGCC  |
| Eoct 140 | TACCTTTAGTAACAATTCCTGATTATCAGTTTG<br>GACACGTAAAACAGAAATAAA  |
| Eoct 141 | CTCTAGAGGATTGCTCAAATATCGCGTTAGCAA<br>ACGCCAGGGTTTTCCCAGTCA  |
| Eoct 142 | TTTAAATGCCGGAACGCAACTGTTGGGAGCCA<br>GCTTGATAAGAGGTCATTTTTG  |
| Eoct 143 | ATTTATCGCGCCCGCTTAGAATCAGAGTTTAG<br>ACTGTAAATCGTCGCTATTAA   |
| Eoct 144 | CCATAAATAAGAGGGGCGGATAAGTGCCTAGG<br>TGTTAGACTGGATAGCGTCCAA  |

## References

1. S. M. Douglas, A. H. Marblestone, S. Teerapittayanon, A. Vazquez, G. M. Church and W. M. Shih, *Nucleic Acids Res.*, 2009, **37**, 5001–5006.
2. Y. Tian, Y. Zhang, T. Wang, H. L. Xin, H. Li and O. Gang, *Nat. Mater.*, 2016, **15**, 654–661.
3. Y. Wang, L. Dai, Z. Ding, M. Ji, J. Liu, H. Xing, X. Liu, Y. Ke, C. Fan, P. Wang and Y. Tian, *Nat. Commun.*, 2021, **12**, 3011.
